# Supplementary material for: Attractant potential of Enterobacter cloacae and its metabolites to Bactrocera dorsalis (Hendel)
Source: Front Physiol. 2024 Oct 3;15:1465946. doi: 10.3389/fphys.2024.1465946 (PMC11484074; doi:10.3389/fphys.2024.1465946)
Supplement: Supplementary file 1 [file Table2.xlsx]

## Sheet: Differential metabolites
ID	Metabolite	Metab ID	KEGG Pathway ID	KEGG Pathway Description	Library ID	Adducts	Formula	Retention time	KEGG Compound ID	Mode	KEGG Compound First Category	KEGG Compound Second Category	KEGG Pathway First Category	KEGG Pathway Second Category	HMDB Superclass	HMDB Class	M/Z	RSD	Fragmentation Score	Theoretical Fragmentation Score	Mass Error	CAS ID	HMDB Subclass	S1	S2	S3	S4	S5	S6	SW1	SW2	SW3	SW4	SW5	SW6	QC01	QC02	QC03
pos_4	L-Prolinamide	metab_3	-	-	-	M+H, 2M+H, M+Na, M+K, 2M+Na, M+H-H2O	C5H10N2O	0.6411	C19781	pos	-	-	-	-	-	-	115.087	0.110315	82.2	-	2.61738	-	-	7.3202	7.2284	7.2949	7.2604	7.2822	7.2718	6.143	6.0809	6.1824	6.1371	6.1116	6.1653	6.9612	7.0418	7.0514
pos_33	N-Acetyl-2,3-dihydro-1H-pyrrole	metab_32	-	-	HMDB0031163	M+CH3OH+H, M+ACN+H, M+NH4, M+H	C6H9NO	0.6816	-	pos	-	-	-	-	Organoheterocyclic compounds	Pyrrolines	129.102	0.0625622	62.4	-	0.486061	23105-58-0	Not Available	6.1426	6.1573	6.172	6.1706	6.1788	6.182	5.8618	5.853	5.8346	5.8636	5.8856	5.8696	6.0103	6.0563	6.06
pos_63	2-Amino-2-methylbutanoate	metab_62	-	-	-	M+ACN+H, M+ACN+Na, M+H	C5H11NO2	0.9795	C03571	pos	-	-	-	-	-	-	118.086	0.043127	92.1	-	0.477586	-	-	7.2966	7.3085	7.2964	7.2925	7.3039	7.3304	7.5546	7.566	7.5525	7.5611	7.5359	7.5625	7.4474	7.4717	7.4352
pos_65	1,4-Methylimidazoleacetic acid	metab_64	-	-	-	M+H, M+CH3OH+H, M+H-H2O	C6H8N2O2	1.0133	-	pos	-	-	-	-	-	-	141.066	0.038761	65.9	-	0.0304021	-	-	6.8862	6.9245	6.89	6.9272	6.9246	6.9574	5.6856	5.6756	5.6482	5.6704	5.6792	5.6334	6.6648	6.6964	6.6714
pos_71	THTC	metab_70	-	-	-	M+H, M+NH4, M+H-H2O	C5H8O2S	1.1003	C11074	pos	-	-	-	-	-	-	150.058	0.0718273	77.5	-	0.369109	-	-	7.5122	7.5246	7.4967	7.5232	7.5162	7.5482	8.0154	8.0085	8.0045	7.9986	7.9792	8.0259	7.8072	7.8639	7.8609
pos_102	Aspergillic acid	metab_101	-	-	-	M+NH4, 2M+Na, M+H	C12H20N2O2	2.3617	C10571	pos	-	-	-	-	-	-	242.186	0.0113169	51.6	-	-0.420375	-	-	6.7129	6.66	6.6513	6.6733	6.6924	6.661	6.1285	6.1281	6.146	6.1209	6.1194	6.129	6.4929	6.5002	6.4909
pos_106	2,3-Dihydrowithanolide E	metab_105	-	-	HMDB0034057	M+2Na-H, M+ACN+Na, M+NH4	C28H40O7	2.4706	-	pos	-	-	-	-	Lipids and lipid-like molecules	Steroids and steroid derivatives	506.298	0.0111176	-	67.2	-5.39836	38253-76-8	Steroid lactones	6.8434	6.8175	6.7918	6.7746	6.8106	6.7845	7.0894	7.1026	7.1027	7.1085	7.1094	7.0856	6.9796	6.9823	6.9729
pos_201	TELMISARTAN	metab_200	-	-	HMDB0015101	M+2H, M+NH4, M+H	C33H30N4O2	5.8589	C07710	pos	-	-	-	-	Benzenoids	Benzene and substituted derivatives	515.245	0.108605	81.6	-	-0.378447	144701-48-4	Biphenyls and derivatives	5.2734	5.2512	5.3536	5.1845	5.0335	5.1337	4.7224	4.6773	4.6901	4.6963	4.9998	4.9017	6.1929	6.1079	6.1201
pos_227	PE(16:0/0:0)	metab_226	-	-	HMDB0011503;LMGP02050002	M+H, M+Na, M+2Na-H	C21H44NO7P	6.3554	-	pos	-	-	-	-	Lipids and lipid-like molecules	Glycerophospholipids	476.275	0.179433	89.2	-	-0.213644	-	Glycerophosphoethanolamines	6.1448	6.13	6.0909	6.1563	6.1464	6.1431	5.3861	5.1233	5.3369	5.2491	5.4691	5.309	6.1194	6.1299	6.2537
pos_228	PE(17:1(9Z)/0:0)	metab_227	-	-	LMGP02050008	M+H, M+2Na-H, M+Na	C22H44NO7P	6.3283	-	pos	-	-	-	-	-	-	466.293	0.194024	81.4	-	0.204956	-	-	5.931	6.0091	5.8611	6.0164	5.9325	6.0135	5.3606	5.137	5.1222	5.1826	5.344	5.2538	5.631	5.6897	5.7941
pos_354	Dihydrocoumarin	metab_352	map00624;map01120	Polycyclic aromatic hydrocarbon degradation; Microbial metabolism in diverse environments	HMDB0036626	M+H-H2O, M+H, M+NH4	C9H8O2	2.0838	C02274	pos	-	-	Metabolism;Metabolism	Xenobiotics biodegradation and metabolism;Global and overview maps	Phenylpropanoids and polyketides	3,4-dihydrocoumarins	166.086	0.0670129	66.4	-	0.622193	119-84-6	Not Available	7.7967	7.8736	7.866	7.8785	7.87	7.9275	8.111	8.1581	8.1154	8.1504	8.0817	8.1589	7.9928	8.0367	8.0491
pos_850	Physapubenolide	metab_848	-	-	HMDB0033976;LMST01160015	M+2H, M+H	C30H40O8	2.3821	-	pos	-	-	-	-	Lipids and lipid-like molecules	Steroids and steroid derivatives	265.142	0.194012	-	65.7	-5.60238	100217-92-3	Steroid lactones	4.5284	4.8157	4.8129	4.8599	4.6624	4.5901	5.6332	5.5393	5.5524	5.4365	5.4184	5.5032	5.1665	5.1638	5.3045
pos_1217	Indolylacryloylglycine	metab_1215	-	-	HMDB0006005	M+H-H2O, M+ACN+Na	C13H12N2O3	3.6302	-	pos	-	-	-	-	Organic acids and derivatives	Carboxylic acids and derivatives	308.103	0.00561764	-	50.6	-0.408537	3475-68-1	Amino acids, peptides, and analogues	5.7404	5.7481	5.7655	5.7564	5.7016	5.7289	5.5328	5.527	5.511	5.5051	5.527	5.5236	5.6451	5.6459	5.6413
pos_1428	Convalloside	metab_1426	-	-	HMDB0034195	M+NH4, M+ACN+H	C35H52O15	4.6918	C19986	pos	-	-	-	-	Lipids and lipid-like molecules	Steroids and steroid derivatives	754.387	0.190466	-	63.7	-9.37009	13473-51-3	Steroid lactones	5.8314	5.7771	5.7224	5.9185	5.665	5.63	4.8165	4.4266	4.7741	4.8495	4.7479	4.7796	5.4168	5.249	5.344
pos_1714	PE(16:0/20:5(5Z,8Z,11Z,14Z,17Z))	metab_1712	-	-	HMDB0008939;LMGP02011221	M+H, M+Na	C41H72NO8P	6.8482	-	pos	-	-	-	-	Lipids and lipid-like molecules	Glycerophospholipids	738.505	0.183259	57.6	-	-3.15933	-	Glycerophosphoethanolamines	5.7257	5.6489	5.6473	5.7972	5.668	5.5472	5.9542	6.017	5.9167	5.9635	5.9082	5.9903	5.8498	5.7365	5.8979
pos_2189	Benzaldehyde	metab_2185	map01100;map00627;map00623;map01120;map01220	Metabolic pathways; Aminobenzoate degradation; Toluene degradation; Microbial metabolism in diverse environments; Degradation of aromatic compounds	HMDB0006115	M+H, M+ACN+H	C7H6O	2.0838	C00261	pos	-	-	Metabolism;Metabolism;Metabolism;Metabolism;Metabolism	Global and overview maps;Xenobiotics biodegradation and metabolism;Xenobiotics biodegradation and metabolism;Global and overview maps;Global and overview maps	Benzenoids	Benzene and substituted derivatives	107.049	0.085236	67.4	-	3.31665	100-52-7	Benzoyl derivatives	5.725	5.8332	5.8228	5.8341	5.8071	5.8947	6.0416	6.0937	6.0259	6.1047	6.0247	6.111	5.9226	5.9755	5.9955
pos_2365	Homoglutamine	metab_2361	-	-	-	M+H, M+Na	C6H12N2O3	0.6683	-	pos	-	-	-	-	-	-	161.092	0.122916	73	-	0.252855	-	-	4.9679	4.8169	4.9784	4.9445	4.9131	4.9782	5.1811	5.161	5.3041	5.2158	5.2527	5.2556	5.0316	5.0759	5.1371
pos_2383	Imidazolepropionic acid	metab_2379	map00340	Histidine metabolism	HMDB0002271	M+H-H2O, M+CH3OH+H	C6H8N2O2	0.6884	C20522	pos	-	-	Metabolism	Amino acid metabolism	Organoheterocyclic compounds	Azoles	123.055	0.0745002	-	52.3	1.32712	1074-59-5	Imidazoles	6.0153	6.0257	6.0252	6.0221	6.0493	6.0429	5.4917	5.4767	5.5033	5.4487	5.5166	5.457	5.8142	5.8716	5.8715
pos_2519	METHIONAL	metab_2515	-	-	HMDB0031857	M+H-H2O, M+H	C4H8OS	1.1003	-	pos	-	-	-	-	Organic oxygen compounds	Organooxygen compounds	87.0269	0.0720379	59.5	-	5.49744	3268-49-3	Carbonyl compounds	5.2567	5.2506	5.2457	5.2545	5.2294	5.2598	5.7683	5.7513	5.7522	5.7492	5.7396	5.7791	5.5499	5.6104	5.5975
pos_2521	N6-Carbamoyl-DL-Lysine	metab_2517	-	-	-	M+H, M+2Na-H	C7H15N3O3	0.6344	-	pos	-	-	-	-	-	-	190.119	0.100097	73.5	-	0.041349	-	-	6.059	5.8792	6.0597	5.9544	6.0374	5.9272	5.5615	5.4864	5.6766	5.6078	5.5606	5.6595	5.7649	5.8503	5.8295
pos_2774	Tuftsin	metab_2770	-	-	HMDB0005770	M+2H	C21H40N8O6	0.932	-	pos	-	-	-	-	Organic acids and derivatives	Carboxylic acids and derivatives	251.161	0.0764735	-	57.1	0.120716	112592-90-2	Amino acids, peptides, and analogues	4.9634	4.9529	4.9233	4.9159	4.9436	4.926	5.0196	5.1536	5.1395	5.1392	5.1388	5.1227	5.0633	5.0164	5.0819
pos_2853	Barbital	metab_2849	-	-	-	M+H	C8H12N2O3	1.0604	-	pos	-	-	-	-	-	-	185.092	0.215618	51.4	-	0.123008	-	-	5.2855	5.314	5.292	5.2966	5.3564	5.3735	5.0399	5.1366	5.0142	5.0974	5.1374	5.1216	5.0233	5.2084	5.1847
pos_2920	11-alpha-O-beta-D-Glucopyranosyl-16alpha-O-methylneoquassin	metab_2915	-	-	HMDB0039773	M+H+Na	C29H44O11	1.1806	-	pos	-	-	-	-	Lipids and lipid-like molecules	Prenol lipids	296.14	0.089464	-	54.1	-7.09854	-	Terpene glycosides	5.3371	5.3057	5.2954	5.2776	5.2075	5.3387	5.0865	5.2011	5.0773	5.0498	5.0094	5.058	5.1957	5.2729	5.2487
pos_3000	5'-Deoxy-5-fluorocytidine	metab_2995	map00983	Drug metabolism - other enzymes	HMDB0060405	M+NH4	C9H12FN3O4	1.2628	C16635	pos	-	-	Metabolism	Xenobiotics biodegradation and metabolism	Nucleosides, nucleotides, and analogues	5'-deoxyribonucleosides	263.114	0.0942382	-	60.9	-4.4671	-	Not Available	5.3969	5.3552	5.3243	5.3059	5.3149	5.3897	5.1108	5.1438	5.2443	5.081	5.0852	5.1646	5.2761	5.3583	5.3233
pos_3043	N,N-dimethylhistidine	metab_3038	-	-	-	M+H	C8H13N3O2	1.3499	C04259	pos	-	-	-	-	-	-	184.108	0.0215328	65.8	-	0.293956	-	-	5.5955	5.5798	5.5529	5.5736	5.5778	5.5951	5.2514	5.2387	5.2103	5.273	5.2287	5.2838	5.4506	5.4693	5.4594
pos_3049	2-Methyl-1-hydroxypropyl-ThPP	metab_3044	map00280	Valine, leucine and isoleucine degradation	HMDB0006866	M+NH4	C16H27N4O8P2S+	1.3702	C15976	pos	-	-	Metabolism	Amino acid metabolism	Organoheterocyclic compounds	Diazines	515.139	0.00496556	-	50.6	5.02099	-	Pyrimidines and pyrimidine derivatives	6.035	6.0723	6.0347	6.0548	6.0486	6.0942	6.5893	6.6305	6.5719	6.5962	6.5933	6.6293	6.4187	6.4161	6.4203
pos_3106	Neuromedin B (1-3)	metab_3101	-	-	HMDB0013016	M+H-2H2O	C12H22N4O5	1.4922	-	pos	-	-	-	-	Organic acids and derivatives	Carboxylic acids and derivatives	267.145	0.137234	-	70.1	-1.08177	-	Amino acids, peptides, and analogues	5.1224	4.9935	5.0605	5.113	5.0865	5.0985	4.7089	4.7425	4.7209	4.6023	4.6433	4.5688	5.0083	4.91	4.9072
pos_3124	KAPA	metab_3119	map01100;map00780	Metabolic pathways; Biotin metabolism	HMDB0240687	M+H	C9H17NO3	1.5394	C01092	pos	-	-	Metabolism;Metabolism	Global and overview maps;Metabolism of cofactors and vitamins	-	-	188.128	0.166863	59.7	-	0.50068	-	-	4.7241	4.5998	4.5485	4.7692	4.6419	4.4336	4.8575	4.9446	4.826	4.9485	4.8734	4.9091	4.9037	4.8195	4.7611
pos_3148	Uzarigenin 3-[xylosyl-(1->2)-rhamnoside]	metab_3143	-	-	HMDB0036296	M+H+Na	C34H52O12	1.606	-	pos	-	-	-	-	Lipids and lipid-like molecules	Steroids and steroid derivatives	338.174	0.0230472	-	67.4	7.55666	255861-29-1	Steroid lactones	5.6065	5.8203	5.8207	5.866	5.827	5.8591	5.0889	5.1562	4.0783	4.5117	5.0969	4.184	5.6332	5.6426	5.6532
pos_3165	Kanokoside D	metab_3160	-	-	HMDB0036105	M+H-2H2O	C27H44O16	1.6652	C17431	pos	-	-	-	-	Lipids and lipid-like molecules	Prenol lipids	589.246	0.0743905	-	50.9	-4.85748	64703-88-4	Terpene glycosides	6.1593	6.2156	6.1785	6.1824	6.1893	6.1401	5.361	5.4815	5.2704	5.5852	5.3841	5.2013	5.9808	5.9462	6.011
pos_3211	1-Methyladenosine	metab_3206	-	-	HMDB0003331	M+H	C11H15N5O4	1.7245	C02494	pos	-	-	-	-	Nucleosides, nucleotides, and analogues	Purine nucleosides	282.12	0.0498091	65.8	-	-0.0283019	15763-06-1	Not Available	5.5166	5.5572	5.5608	5.5787	5.5462	5.5766	5.3404	5.3867	5.3651	5.336	5.2766	5.3798	5.407	5.4503	5.4301
pos_3465	Dinorpromazine	metab_3460	-	-	-	M+H	C15H16N2S	1.9345	-	pos	-	-	-	-	-	-	257.113	0.220653	64.6	-	9.10499	-	-	5.1325	5.0843	5.0957	5.2709	5.17	5.177	5.4199	5.3965	5.4066	5.4219	5.4015	5.4825	5.1938	5.3351	5.3898
pos_3508	Isonicotinamide, 2-propyl-	metab_3503	-	-	-	M+H	C9H12N2O	1.9747	-	pos	-	-	-	-	-	-	165.102	0.0500885	51.1	-	0.388568	-	-	5.3773	5.2999	5.3937	5.3717	5.3872	5.3408	3.9152	4.0938	3.9414	3.9166	3.7894	3.9624	5.1167	5.1141	5.1525
pos_3707	8-Hydroxy-5,6-octadienoic acid	metab_3702	-	-	LMFA01031076;HMDB0031101	M+H-2H2O	C8H12O3	2.0838	-	pos	-	-	-	-	Organic acids and derivatives	Hydroxy acids and derivatives	121.065	0.0646533	-	71.1	0.578463	-	Medium-chain hydroxy acids and derivatives	5.3494	5.4773	5.4663	5.473	5.4104	5.5281	5.6561	5.7018	5.6437	5.6583	5.6073	5.6846	5.5467	5.5967	5.5959
pos_3708	3-Methyl-1-phenyl-1-butanone	metab_3703	-	-	-	M+H	C11H14O	2.0838	-	pos	-	-	-	-	-	-	163.112	0.0845582	74.9	-	0.197107	-	-	5.1444	5.2994	5.2906	5.2011	5.2261	5.322	5.4913	5.5626	5.4646	5.5446	5.4217	5.5156	5.3754	5.422	5.4488
pos_3710	Tranylcypromine glucuronide	metab_3705	-	-	-	M+H	C15H19NO6	2.0905	-	pos	-	-	-	-	-	-	310.128	0.0605184	76.2	-	-0.075782	-	-	4.0181	4.0547	4.6858	4.052	4.8631	4.364	6.0291	6.0852	6.0526	6.0703	6.0421	6.0695	5.7511	5.7661	5.7144
pos_4055	N,N-dimethyl-L-Valine	metab_4050	-	-	-	M+H	C7H15NO2	2.4026	-	pos	-	-	-	-	-	-	146.118	0.0231573	73	-	-0.116125	-	-	6.5202	6.4882	6.4964	6.5053	6.5304	6.5108	6.6888	6.7201	6.6969	6.7372	6.7566	6.6907	6.6314	6.6509	6.6374
pos_4105	Isoleucyl-Arginine	metab_4100	-	-	HMDB0028901	M+H-H2O	C12H25N5O3	2.4569	-	pos	-	-	-	-	Organic acids and derivatives	Carboxylic acids and derivatives	270.192	0.00343965	-	68.8	-0.341539	-	Amino acids, peptides, and analogues	5.9743	5.9173	5.9263	5.9033	5.9625	5.9695	5.1918	5.1655	5.1306	5.1781	5.216	5.2393	5.7518	5.7488	5.7508
pos_4502	PS(DiMe(11,3)/DiMe(13,5))	metab_4497	-	-	HMDB0061554	M+2Na	C50H86NO12P	2.8717	-	pos	-	-	-	-	Lipids and lipid-like molecules	Glycerophospholipids	484.78	0.0656497	-	56.4	-8.23193	-	Glycerophosphoserines	5.7409	5.6568	5.7667	5.7246	5.7129	5.7189	5.9708	5.9818	5.9408	5.9685	5.9969	5.9929	5.8432	5.8954	5.8515
pos_4569	Phenylalanyl-Valine	metab_4564	-	-	HMDB0029008	M+H	C14H20N2O3	2.9603	-	pos	-	-	-	-	Organic acids and derivatives	Carboxylic acids and derivatives	265.154	0.00943332	61.5	-	-0.760635	-	Amino acids, peptides, and analogues	5.7635	5.7141	5.6956	5.6818	5.7246	5.7041	5.0503	5.0996	5.1528	5.0272	5.1324	5.0842	5.5093	5.5019	5.5026
pos_4578	Prolyl-Methionine	metab_4573	-	-	HMDB0029023	M+H-H2O	C10H18N2O3S	2.9671	-	pos	-	-	-	-	Organic acids and derivatives	Carboxylic acids and derivatives	229.101	0.00877865	-	61.3	-0.0935016	-	Amino acids, peptides, and analogues	6.8542	6.8806	6.8386	6.8112	6.8543	6.8514	6.2987	6.2684	6.2896	6.2954	6.2886	6.273	6.6739	6.6724	6.6667
pos_4625	Oxytocin 1-8	metab_4620	-	-	HMDB0013033	M+H-H2O	C40H60N10O12S2	3.0079	-	pos	-	-	-	-	Organic acids and derivatives	Carboxylic acids and derivatives	919.389	0.155717	-	93.3	9.07326	-	Amino acids, peptides, and analogues	6.1154	6.1246	6.1711	6.1381	6.1649	6.1755	6.3815	6.3747	6.3017	6.3833	6.3528	6.3574	6.3432	6.2164	6.2493
pos_4709	Schidigerasaponin F2	metab_4704	-	-	HMDB0036244	M+2Na-H	C39H64O14	3.131	-	pos	-	-	-	-	Lipids and lipid-like molecules	Steroids and steroid derivatives	801.398	0.219362	-	67.2	-3.76746	267003-05-4	Steroidal glycosides	5.7199	5.8899	5.9134	5.9131	5.8597	5.8226	5.4744	5.4174	5.345	5.5535	5.3811	5.2962	5.8394	5.6505	5.7339
pos_4834	Oxypinnatanine	metab_4829	-	-	HMDB0029403	M+ACN+H	C10H16N2O6	3.2884	-	pos	-	-	-	-	Organic acids and derivatives	Carboxylic acids and derivatives	302.135	0.121003	-	53.5	-0.589607	52329-55-2	Amino acids, peptides, and analogues	5.4811	5.4494	5.458	5.4539	5.4842	5.5281	5.1338	5.1161	5.0507	5.0089	4.9996	5.0139	5.2772	5.3828	5.346
pos_4929	Corchoroside A	metab_4924	-	-	HMDB0033846	M+ACN+H	C29H42O9	3.3978	-	pos	-	-	-	-	Lipids and lipid-like molecules	Steroids and steroid derivatives	576.313	0.0235833	-	69.4	-7.25264	508-76-9	Steroid lactones	6.0921	6.087	6.1	6.0756	6.0694	6.0863	5.8808	5.8793	5.8631	5.864	5.8883	5.9297	5.9986	5.9809	5.9811
pos_4960	3-trans-p-Coumaroylrotundic acid	metab_4955	-	-	HMDB0040667	M+ACN+Na	C39H54O7	3.4322	-	pos	-	-	-	-	Lipids and lipid-like molecules	Prenol lipids	698.409	0.0202256	-	77.7	9.1995	144624-03-3	Triterpenoids	6.4977	6.4372	6.4536	6.4421	6.4408	6.4692	5.9808	5.9695	5.9605	5.8842	5.9441	5.9529	6.2822	6.2667	6.2817
pos_4978	5-Hydroxyindoleacetylglycine	metab_4973	map00380	Tryptophan metabolism	HMDB0004185	M+H-2H2O	C12H12N2O4	3.4527	C05832	pos	-	-	Metabolism	Amino acid metabolism	Organic acids and derivatives	Carboxylic acids and derivatives	213.066	0.0699594	-	50.9	-0.154189	-	Amino acids, peptides, and analogues	5.2075	5.2629	5.2271	5.1638	5.1743	5.1952	4.5511	4.4755	4.5117	4.4785	4.4852	4.5053	4.9395	4.9628	4.9994
pos_5202	Carboxyprimaquine	metab_5197	-	-	-	M+H	C15H18N2O3	3.7467	-	pos	-	-	-	-	-	-	275.139	0.0779417	57.2	-	-0.501029	-	-	4.7094	4.6944	4.7257	4.7691	4.7118	4.854	5.3702	5.268	5.3309	5.2856	5.2813	5.2974	5.0731	5.0077	5.0598
pos_5236	6S,9R-Dihydroxy-4,7E-megastigmadien-3-one 9-[apiosyl-(1->6)-glucoside]	metab_5231	-	-	HMDB0029773	M+ACN+H	C24H38O12	3.8015	-	pos	-	-	-	-	Lipids and lipid-like molecules	Fatty Acyls	560.272	0.0186942	-	61.3	3.17006	-	Fatty acyl glycosides	6.3473	6.3179	6.3411	6.3071	6.2998	6.3631	6.1083	6.1009	6.151	6.1401	6.1044	6.0686	6.236	6.2442	6.2279
pos_5266	Quillaic acid 3-[galactosyl-(1->2)-[rhamnosyl-(1->3)]-glucuronide] 28-[6-acetyl-glucosyl-(1->3)-[glucosyl-(1->3)-[xylosyl-(1->4)]-rhamnosyl-(1->2)]-4-acetyl-fucosyl] ester	metab_5261	-	-	HMDB0036953	M+2Na	C81H126O44	3.8493	-	pos	-	-	-	-	Lipids and lipid-like molecules	Prenol lipids	924.366	0.0203552	-	62.8	-4.32628	299184-62-6	Terpene glycosides	6.3428	6.4378	6.4748	6.4899	6.4922	6.482	6.7071	6.8278	6.7622	6.7867	6.7735	6.7925	6.6121	6.6276	6.6126
pos_5288	(S)-a-Amino-2,5-dihydro-5-oxo-4-isoxazolepropanoic acid N2-glucoside	metab_5283	-	-	HMDB0029404	M+H-2H2O	C12H18N2O9	3.8903	-	pos	-	-	-	-	Organic oxygen compounds	Organooxygen compounds	299.085	0.122729	-	66.2	-7.91003	29790-46-3	Carbohydrates and carbohydrate conjugates	4.9649	4.912	4.7981	4.8209	4.8454	4.8543	5.7576	5.7331	5.7851	5.8314	5.7796	5.7737	5.4267	5.5134	5.5294
pos_5374	(3b,22a)-12-Oleanene-3,22,24,29-tetrol 3-[arabinosyl-(1->3)-arabinoside]	metab_5369	-	-	HMDB0034818	M+2Na-H	C40H66O12	4.0067	-	pos	-	-	-	-	Lipids and lipid-like molecules	Prenol lipids	783.424	0.0248639	-	65.1	-3.19362	211944-26-2	Triterpenoids	6.6112	6.6105	6.6128	6.6263	6.6068	6.5639	6.2912	6.2634	6.3362	6.3069	6.2914	6.2548	6.4893	6.468	6.4757
pos_5552	3-Indoleacetic Acid	metab_5547	map01100;map00380	Metabolic pathways; Tryptophan metabolism	HMDB0000197	M+H	C10H9NO2	4.2599	C00954	pos	-	-	Metabolism;Metabolism	Global and overview maps;Amino acid metabolism	Organoheterocyclic compounds	Indoles and derivatives	176.071	0.0130447	78.8	-	-0.232993	-	Indolyl carboxylic acids and derivatives	5.1988	5.1755	5.1702	5.181	5.1367	5.1461	4.8303	4.8217	4.7524	4.7719	4.8322	4.8066	5.0008	4.9896	4.9968
pos_5709	N-Acetyl-DL-tryptophan	metab_5704	-	-	-	M+H	C13H14N2O3	4.4929	-	pos	-	-	-	-	-	-	247.108	0.00453779	95	-	-0.610436	-	-	5.3611	5.3478	5.3424	5.4513	5.3551	5.3447	5.1958	5.0549	5.1723	5.1811	5.1525	5.1245	5.2857	5.2896	5.2871
pos_5877	Cucurbitacin C	metab_5872	-	-	HMDB0034706;LMST01010105	M+ACN+H	C32H48O8	4.7607	C08795	pos	-	-	-	-	Lipids and lipid-like molecules	Steroids and steroid derivatives	602.366	0.0847504	-	60.3	-5.62412	5988-76-1	Cucurbitacins	5.784	5.8071	5.7801	5.8607	5.9034	5.9374	6.4274	6.4253	6.4138	6.4166	6.4334	6.4356	6.142	6.176	6.2154
pos_6062	(3-Phenylpropionyl)glycine methyl ester	metab_6057	-	-	-	M+H	C12H15NO3	5.1095	-	pos	-	-	-	-	-	-	222.112	0.032489	56.4	-	-0.235868	-	-	5.3542	5.3411	5.3215	5.326	5.2988	5.252	5.1065	5.0675	5.0855	5.1349	5.1374	5.1067	5.2418	5.2312	5.2137
pos_6075	Madlongiside C	metab_6070	-	-	HMDB0037904	M+ACN+H	C35H56O10	5.1301	-	pos	-	-	-	-	Lipids and lipid-like molecules	Prenol lipids	678.419	0.112515	-	59	-4.07157	67258-70-2	Triterpenoids	6.203	6.1503	6.1062	6.1463	6.1067	6.0887	5.8176	5.7879	5.8664	5.8256	5.7738	5.8567	6.0559	5.9646	5.9858
pos_6183	Myricatomentoside I	metab_6178	-	-	HMDB0031536	M+H	C26H32O10	5.3363	-	pos	-	-	-	-	Lignans, neolignans and related compounds	Lignan glycosides	505.212	0.0514858	-	50.7	9.45748	191999-61-8	Not Available	5.7332	5.7476	5.7229	5.7027	5.688	5.6577	5.4861	5.4799	5.5113	5.5153	5.4701	5.5003	5.5701	5.6094	5.6095
pos_6342	Paxilline	metab_6337	map01110	Biosynthesis of secondary metabolites	HMDB0030323	2M+H	C27H33NO4	5.6111	C13782	pos	-	-	Metabolism	Global and overview maps	Organoheterocyclic compounds	Naphthopyrans	871.493	0.121093	-	51.1	4.24791	57186-25-1	Not Available	6.0034	5.9738	5.9262	5.9213	5.9039	5.9608	6.223	6.134	6.2609	6.212	6.0105	6.25	6.0904	5.9866	6.0295
pos_6469	Methionyl-Valine	metab_6464	-	-	HMDB0028986	M+ACN+Na	C10H20N2O3S	5.79	-	pos	-	-	-	-	Organic acids and derivatives	Carboxylic acids and derivatives	312.134	0.0394347	-	60.9	-4.98449	-	Amino acids, peptides, and analogues	6.0628	6.0872	6.0906	6.0796	6.1145	6.0825	5.8671	5.8767	5.942	5.9327	5.9227	5.8638	5.9788	6.008	6.0097
pos_6480	Descladinose roxithromycin	metab_6475	-	-	HMDB0060814	M+ACN+Na	C33H62N2O12	5.8038	-	pos	-	-	-	-	Organic oxygen compounds	Organooxygen compounds	742.45	0.00617577	-	86.8	5.39309	-	Carbohydrates and carbohydrate conjugates	6.5921	6.5591	6.5821	6.5875	6.5814	6.5584	6.8058	6.819	6.8407	6.8093	6.776	6.8454	6.7119	6.707	6.7112
pos_6658	2-amino-tetradecanoic acid	metab_6653	-	-	LMFA01100007	M+H	C14H29NO2	6.0845	-	pos	-	-	-	-	-	-	244.227	0.177329	67.3	-	-0.308695	-	-	4.7589	4.9816	4.7893	4.8979	4.8578	4.9068	4.5415	4.6315	4.5697	4.3636	4.5307	4.3239	4.766	4.6701	4.617
pos_7223	Ganoderic acid Mj	metab_7215	-	-	HMDB0035354	M+Na	C33H52O6	6.8681	-	pos	-	-	-	-	Lipids and lipid-like molecules	Prenol lipids	567.361	0.239558	-	74.6	-8.65481	110024-15-2	Triterpenoids	5.8949	5.9058	5.9388	5.9312	5.9216	5.9312	4.6305	4.4901	4.8592	4.8305	4.7357	4.5619	5.6299	5.742	5.841
pos_7224	Panaxatriol	metab_7216	-	-	HMDB0038244	M+Na	C30H52O4	6.8681	-	pos	-	-	-	-	Lipids and lipid-like molecules	Prenol lipids	499.373	0.231088	-	57.7	-4.87161	-	Triterpenoids	6.2588	6.292	6.3393	6.3243	6.3122	6.3308	5.0994	5.1254	5.0889	5.1952	5.3292	5.295	6.0177	6.1261	6.2212
pos_7225	1-Palmitoyl-2-linoleoyl PE	metab_7217	-	-	-	M+H	C39H74NO8P	6.8549	-	pos	-	-	-	-	-	-	716.522	0.172304	93	-	-0.129237	-	-	5.715	5.7166	5.6326	5.6736	5.6259	5.6253	5.8214	5.901	5.8233	5.8846	5.8497	5.883	5.6685	5.6832	5.7998
pos_7683	Dihydrolipoamide	metab_7669	-	-	HMDB0000985;LMFA08010019	M+H	C8H17NOS2	5.9483	C00579	pos	-	-	-	-	Lipids and lipid-like molecules	Fatty Acyls	208.082	0.26297	-	54.2	0.274636	3884-47-7	Fatty amides	5.4128	5.3317	5.299	5.2763	5.2181	5.1994	4.8266	4.9268	4.9705	4.9958	4.974	4.9723	5.2468	5.0101	5.1706
pos_7923	(1R,16Z,24E,26E,28Z)-1,18-dihydroxy-12-[1-(4-hydroxy-3-methoxycyclohexyl)propan-2-yl]-19,30-dimethoxy-15,17,21,29,35-pentamethyl-23-methylidene-11,36-dioxa-4-azatricyclo[30.3.1.0?,?]hexatriaconta-16,24,26,28-tetraene-2,3,10,14,20-pentone	metab_7909	-	-	HMDB0127644	M+H-2H2O	C51H77NO13	5.7625	-	pos	-	-	-	-	Phenylpropanoids and polyketides	Macrolide lactams	876.518	0.211599	-	91.2	-8.47012	-	Not Available	5.5272	5.4519	5.445	5.4144	5.3972	5.3404	5.6169	5.7266	5.7621	5.6294	5.645	5.6872	5.676	5.5154	5.5346
pos_8046	Mabioside D	metab_8032	-	-	HMDB0040655	M+2Na-H	C42H70O14	5.6592	-	pos	-	-	-	-	Lipids and lipid-like molecules	Prenol lipids	843.444	0.0833337	-	64.4	-5.26223	156980-55-1	Triterpenoids	6.7175	6.6741	6.7064	6.6862	6.6846	6.6526	6.2923	6.3128	6.3416	6.307	6.3165	6.3369	6.5717	6.5059	6.5159
pos_8065	4-Hydroxybenzaldehyde	metab_8051	map01100;map00363;map00623;map01120;map00627	Metabolic pathways; Bisphenol degradation; Toluene degradation; Microbial metabolism in diverse environments; Aminobenzoate degradation	HMDB0011718	M+H	C7H6O2	5.6386	C00633	pos	-	-	Metabolism;Metabolism;Metabolism;Metabolism;Metabolism	Global and overview maps;Xenobiotics biodegradation and metabolism;Xenobiotics biodegradation and metabolism;Global and overview maps;Xenobiotics biodegradation and metabolism	Organic oxygen compounds	Organooxygen compounds	123.044	0.0570056	91.3	-	1.38372	123-08-0	Carbonyl compounds	5.0224	4.9976	5.0119	5.0208	5.0133	4.9852	4.7186	4.7369	4.7628	4.7678	4.7543	4.7542	4.9091	4.8751	4.9239
pos_8103	Ganglioside GD3 (d18:1/16:0)	metab_8089	-	-	HMDB0004913	M+H+Na	C68H121N3O29	5.5973	C06133	pos	-	-	-	-	Lipids and lipid-like molecules	Sphingolipids	733.906	0.0856144	-	50.5	4.34758	-	Glycosphingolipids	6.0182	6.0368	5.9997	6.0126	5.9656	5.9625	5.7508	5.8295	5.7954	5.7181	5.7868	5.8298	5.9198	5.8682	5.9419
pos_8131	L-2-Amino-5-(methylthio)pentanoic acid	metab_8117	map01210;map01110	2-Oxocarboxylic acid metabolism; Biosynthesis of secondary metabolites	HMDB0030406	M+H-H2O	C6H13NO2S	5.5629	C17213	pos	-	-	Metabolism;Metabolism	Global and overview maps;Global and overview maps	Organic acids and derivatives	Carboxylic acids and derivatives	146.063	0.239417	-	56	-0.964036	-	Amino acids, peptides, and analogues	5.0339	5.0643	5.0694	5.0169	4.9674	4.8833	4.5849	4.5895	4.6149	4.6194	4.661	4.6307	4.9144	4.7058	4.8069
pos_8170	Citreoviridin C	metab_8156	-	-	HMDB0030523	2M+NH4	C23H30O6	5.4942	-	pos	-	-	-	-	Organoheterocyclic compounds	Pyrans	822.44	0.028227	-	58.2	-2.78319	74145-78-1	Pyranones and derivatives	6.8238	6.8113	6.8292	6.8179	6.8123	6.7759	7.0035	6.9897	7.0037	6.9897	6.963	6.9605	6.9058	6.8878	6.8826
pos_8323	Cucurbitacin I 2-glucoside	metab_8309	-	-	HMDB0035701	M+H-2H2O	C36H52O12	5.3156	-	pos	-	-	-	-	Lipids and lipid-like molecules	Steroids and steroid derivatives	641.329	0.0506098	-	85.9	-3.73891	29803-94-9	Steroidal glycosides	6.1443	6.1432	6.1768	6.1361	6.1325	6.0935	5.9404	5.9432	5.9777	5.9439	5.9442	5.968	6.0752	6.0401	6.0356
pos_8328	Lucyoside K	metab_8314	-	-	HMDB0041353	M+K	C36H56O9	5.3087	-	pos	-	-	-	-	Lipids and lipid-like molecules	Prenol lipids	671.361	0.105958	-	54.6	8.98886	32448-19-4	Terpene glycosides	6.0777	6.1078	6.0699	6.0534	6.0621	5.9796	5.346	5.4146	5.4198	5.3238	5.4915	5.4497	5.8582	5.7686	5.8396
pos_8336	Lyciumoside VI	metab_8322	-	-	HMDB0033500	M+H-2H2O	C44H74O20	5.295	-	pos	-	-	-	-	Lipids and lipid-like molecules	Prenol lipids	887.466	0.0702207	-	73.1	2.53663	212773-42-7	Terpene glycosides	7.2964	7.2864	7.2927	7.2978	7.2723	7.2514	7.1049	7.0891	7.1072	7.093	7.0945	7.1075	7.2293	7.188	7.1706
pos_8415	Digitoxigenin 3-[glucosyl-(1->6)-glucosyl-(1->4)-2,6-dideoxyribohexoside]	metab_8401	-	-	HMDB0034321	M+H	C41H64O17	5.1921	-	pos	-	-	-	-	Lipids and lipid-like molecules	Steroids and steroid derivatives	829.429	0.0756187	-	66	8.33765	220710-06-5	Steroid lactones	6.7831	6.7846	6.6869	6.7652	6.7433	6.7233	6.5144	6.5133	6.487	6.5269	6.5297	6.5366	6.717	6.6537	6.673
pos_8473	N-desmethylclarithromycin	metab_8458	-	-	HMDB0061020	M+ACN+Na	C37H67NO13	5.1164	-	pos	-	-	-	-	Organic oxygen compounds	Organooxygen compounds	797.476	0.054932	-	91.7	-1.21879	-	Carbohydrates and carbohydrate conjugates	6.7031	6.6714	6.6634	6.6851	6.6584	6.6267	6.8809	6.9037	6.9292	6.8796	6.7501	6.9369	6.7997	6.755	6.7644
pos_8655	Digoxigenin bisdigitoxoside	metab_8640	-	-	HMDB0060818	M+2Na-H	C35H54O11	4.877	-	pos	-	-	-	-	Lipids and lipid-like molecules	Steroids and steroid derivatives	695.34	0.0408849	-	77.6	3.25683	-	Steroid lactones	6.6623	6.6267	6.6474	6.6589	6.6051	6.6017	7.0627	6.9947	7.0527	7.0121	6.8365	7.0601	6.8221	6.8465	6.857
pos_8794	Isoleucyl-Tyrosine	metab_8779	-	-	HMDB0028919	2M+Na	C15H22N2O4	4.6918	-	pos	-	-	-	-	Organic acids and derivatives	Carboxylic acids and derivatives	611.304	0.0167525	-	54	-2.46381	-	Amino acids, peptides, and analogues	6.5519	6.5781	6.5832	6.5665	6.5929	6.5741	6.3478	6.3117	6.3056	6.2964	6.3201	6.3044	6.4784	6.4682	6.4823
pos_8926	Capsoside A	metab_8911	-	-	HMDB0037613	M+NH4	C33H58O15	4.5409	-	pos	-	-	-	-	Lipids and lipid-like molecules	Glycerolipids	712.414	0.00528088	-	58.1	4.10845	-	Glycosylglycerols	6.2015	6.2116	6.1941	6.234	6.1665	6.2014	6.4566	6.4508	6.4513	6.455	6.4627	6.4221	6.3354	6.3399	6.3383
pos_8944	Quillaic acid 3-[rhamnosyl-(1->3)-[galactosyl-(1->2)]-glucuronide]	metab_8929	-	-	HMDB0033405	M+CH3OH+H	C48H74O20	4.5134	-	pos	-	-	-	-	Lipids and lipid-like molecules	Prenol lipids	1003.51	0.0339281	-	75.4	-0.899338	210426-59-8	Terpene glycosides	6.178	6.1682	6.1321	6.175	6.102	6.2048	6.392	6.3714	6.4087	6.3684	6.2721	6.3727	6.3369	6.3433	6.315
pos_8945	N-(3-Indolylacetyl)-L-isoleucine	metab_8930	-	-	-	M+H	C16H20N2O3	4.5134	-	pos	-	-	-	-	-	-	289.154	0.0421861	77.2	-	-0.639033	-	-	5.1176	5.0338	4.994	5.0737	5.014	5.064	5.645	5.5926	5.6956	5.6455	5.6111	5.5686	5.4493	5.4157	5.4462
pos_9013	S-Adenosylmethionine	metab_8998	map01100;map01110;map00270;map00330;map01230;map00261;map04122	Metabolic pathways; Biosynthesis of secondary metabolites; Cysteine and methionine metabolism; Arginine and proline metabolism; Biosynthesis of amino acids; Monobactam biosynthesis; Sulfur relay system	HMDB0001185	M+H-2H2O	C15H23N6O5S+	4.4175	C00019	pos	Vitamins and Cofactors	Cofactors	Metabolism;Metabolism;Metabolism;Metabolism;Metabolism;Metabolism;Genetic Information Processing	Global and overview maps;Global and overview maps;Amino acid metabolism;Amino acid metabolism;Global and overview maps;Biosynthesis of other secondary metabolites;Folding, sorting and degradation	Nucleosides, nucleotides, and analogues	5'-deoxyribonucleosides	364.129	0.0625829	-	86	-5.98511	485-80-3	5'-deoxy-5'-thionucleosides	5.3462	5.4215	5.3295	5.3834	5.293	5.1094	4.7886	5.1541	4.9605	4.7633	4.8951	4.8622	5.188	5.1781	5.2287
pos_9123	(-)-Stercobilin	metab_9108	-	-	HMDB0240259	M+Na	C33H46N4O6	4.308	-	pos	-	-	-	-	Organoheterocyclic compounds	Tetrapyrroles and derivatives	617.329	0.0361046	-	66.2	-2.654	34217-90-8	Bilirubins	6.994	6.9613	6.9691	6.9789	6.9583	6.9267	7.2596	7.2457	7.2696	7.2311	7.1748	7.2729	7.1314	7.1001	7.1173
pos_9125	Perlolyrine	metab_9110	-	-	HMDB0030327	M+H	C16H12N2O2	4.308	C09231	pos	-	-	-	-	Alkaloids and derivatives	Harmala alkaloids	265.097	0.0893915	54.3	-	-0.209156	29700-20-7	Not Available	5.2525	5.265	5.2205	5.2777	5.1871	5.2161	4.8536	4.956	4.8835	4.9517	4.9153	4.8658	5.0851	5.0501	5.1274
pos_9290	Cyclo(L-Phe-L-Pro)	metab_9275	-	-	-	M+H	C14H16N2O2	4.13	C11847	pos	-	-	-	-	-	-	245.128	0.0294291	59.3	-	-0.572587	-	-	7.4562	7.5095	7.4959	7.4923	7.4792	7.5073	6.9866	6.964	6.9764	6.9891	7.0091	6.9841	7.3254	7.3339	7.3505
pos_9343	L-Pyridosine	metab_9328	-	-	HMDB0029443	M+Na	C12H18N2O4	4.082	-	pos	-	-	-	-	Organic acids and derivatives	Carboxylic acids and derivatives	277.118	0.084137	-	82.8	9.33679	31489-08-4	Amino acids, peptides, and analogues	5.4297	5.534	5.466	5.5091	5.4869	5.5093	5.0873	5.0731	5.083	5.1189	5.1159	5.1041	5.3181	5.3645	5.3912
pos_9365	Oxindole	metab_9350	map01110	Biosynthesis of secondary metabolites	HMDB0061918;MJDBOTE0001706	M+H	C8H7NO	4.0614	C12312	pos	-	-	Metabolism	Global and overview maps	Organoheterocyclic compounds	Indoles and derivatives	134.06	0.0278816	95.9	-	0.510076	59-48-3	Indolines	4.5126	4.5618	4.5125	4.629	4.5836	4.5817	4.7226	4.7619	4.7417	4.727	4.7736	4.7337	4.6555	4.6626	4.679
pos_9372	(2b,3b)-Dihydroxy-30-nor-12,20(29)-oleanadiene-28-glucopyranosyloxy-23-oic acid 3-glucuronide	metab_9357	-	-	HMDB0034875	M+H-2H2O	C41H60O17	4.0477	-	pos	-	-	-	-	Lipids and lipid-like molecules	Steroids and steroid derivatives	789.377	0.0345926	-	81.3	9.55445	214840-34-3	Steroidal glycosides	6.465	6.4679	6.5215	6.4953	6.528	6.4991	5.9332	5.8573	5.9294	5.8908	5.9041	5.8565	6.3083	6.2954	6.3253
pos_9483	Hoduloside VIII	metab_9468	-	-	HMDB0040660	M+2H	C46H76O18	3.9385	-	pos	-	-	-	-	Lipids and lipid-like molecules	Prenol lipids	459.26	0.0140687	-	73.8	2.72148	154971-12-7	Triterpenoids	7.6247	7.612	7.6044	7.6229	7.6086	7.5966	7.9118	7.9046	7.9212	7.9192	7.9238	7.9356	7.7824	7.7843	7.7938
pos_10250	Physagulin E	metab_10235	-	-	HMDB0039693	M+H-2H2O	C36H50O14	3.2405	-	pos	-	-	-	-	Lipids and lipid-like molecules	Steroids and steroid derivatives	671.304	0.0273133	-	74.6	-3.64645	148054-13-1	Steroid lactones	6.1328	6.1302	6.0138	6.0662	6.0345	6.0801	5.6709	5.7357	5.7097	5.7428	5.6312	5.7482	5.9713	5.9897	5.9937
pos_10255	15-Oxo-21-hydroxymabiogenin 3-[rhamnosyl-(1->6)-glucoside]	metab_10240	-	-	HMDB0040840	M+H+Na	C42H66O15	3.2405	-	pos	-	-	-	-	Organic oxygen compounds	Organooxygen compounds	417.215	0.0359913	-	52.9	-7.97406	156980-29-9	Carbonyl compounds	5.7984	5.8513	5.7808	5.7668	5.8158	5.7976	6.0577	6.0474	6.1132	6.0437	6.0664	6.0941	5.9511	5.9816	5.9728
pos_10389	Alanyl-Tryptophan	metab_10374	-	-	HMDB0013209	M+H	C14H17N3O3	3.1241	-	pos	-	-	-	-	Organic acids and derivatives	Carboxylic acids and derivatives	276.134	0.0816081	60.1	-	-0.27793	-	Amino acids, peptides, and analogues	5.3566	5.3582	5.3733	5.3413	5.3432	5.4344	5.1212	5.0728	5.0997	5.021	5.1304	5.0961	5.2394	5.2789	5.3106
pos_10398	6-({1-[(2R)-3-[2-amino-3-methyl-4-(2-methyl-1,3-thiazol-4-yl)but-3-en-1-yl]-2-methyloxiran-2-yl]-10-carboxy-9-hydroxy-4,6,8,8-tetramethyl-7-oxodecan-5-yl}oxy)-3,4,5-trihydroxyoxane-2-carboxylic acid	metab_10383	-	-	HMDB0127542	M+NH4	C33H52N2O12S	3.1107	-	pos	-	-	-	-	Lipids and lipid-like molecules	Prenol lipids	718.362	0.0168426	-	82	6.0561	-	Diterpenoids	6.6372	6.631	6.6071	6.6227	6.6073	6.6187	6.8891	6.8787	6.876	6.8803	6.7595	6.9224	6.7536	6.7456	6.7602
pos_10453	2-[(2-amino-3-methylbutanoyl)amino]-3-phenylpropanoic acid	metab_10438	-	-	-	M+H	C14H20N2O3	3.0628	-	pos	-	-	-	-	-	-	265.155	0.119682	81	-	-0.593771	-	-	5.0899	5.2089	5.1781	5.1288	5.0806	5.1658	5.3125	5.2989	5.296	5.3296	5.5803	5.2978	5.3317	5.3334	5.239
pos_10520	SR95531	metab_10505	-	-	-	M+H	C15H17N3O3	3.0013	C13796	pos	-	-	-	-	-	-	288.134	0.0221548	50.4	-	-0.322149	-	-	6.1046	6.1796	6.1336	6.1388	6.0999	6.1604	5.8817	5.9329	5.8889	5.9165	5.8989	5.9191	6.058	6.0617	6.0761
pos_10634	Tuberoside J	metab_10619	-	-	HMDB0039396	M+2Na-H	C39H64O14	2.9192	-	pos	-	-	-	-	Lipids and lipid-like molecules	Steroids and steroid derivatives	801.399	0.0311683	-	58.5	-1.72154	373647-08-6	Steroidal glycosides	6.9134	6.9004	6.8978	6.8978	6.9029	6.912	6.6732	6.6876	6.7053	6.6753	6.6672	6.6887	6.8294	6.8252	6.804
pos_10726	Asparaginyl-Arginine	metab_10711	-	-	HMDB0028725	2M+Na	C10H20N6O4	2.8445	-	pos	-	-	-	-	Organic acids and derivatives	Carboxylic acids and derivatives	599.303	0.0811203	-	67	7.9065	-	Amino acids, peptides, and analogues	5.8653	5.9104	5.8118	5.7788	5.8942	5.8656	5.7486	5.5402	5.6648	5.6125	5.6531	5.5734	5.75	5.795	5.7265
pos_10782	(3b,20R,22R)-3,20,27-Trihydroxy-1-oxowitha-5,24-dienolide 3-glucoside	metab_10767	-	-	HMDB0033573	M+NH4	C34H50O11	2.797	-	pos	-	-	-	-	Lipids and lipid-like molecules	Steroids and steroid derivatives	652.366	0.00750237	-	86.9	-4.17714	227179-09-1	Steroid lactones	6.4417	6.4498	6.4372	6.4207	6.4333	6.422	8.4467	8.4374	8.4328	8.4461	8.4387	8.4123	8.1068	8.101	8.1065
pos_11130	Alanyl-Proline	metab_11115	-	-	HMDB0028695	M+ACN+H	C8H14N2O3	2.5661	-	pos	-	-	-	-	Organic acids and derivatives	Carboxylic acids and derivatives	228.134	0.067051	-	70.4	-0.166294	-	Amino acids, peptides, and analogues	5.8654	5.8596	5.9032	5.9041	5.8816	5.9423	5.4772	5.5104	5.4585	5.4246	5.4711	5.4731	5.7494	5.789	5.7329
pos_11168	5-Hydroxyprimaquine	metab_11152	-	-	-	M+H	C15H21N3O2	2.539	-	pos	-	-	-	-	-	-	276.171	0.00564725	65.8	-	0.059152	-	-	5.9279	5.9278	5.948	5.9427	5.9763	5.932	5.2435	5.1782	5.2119	5.2502	5.2464	5.1279	5.7494	5.7521	5.7472
pos_11457	N-Acetyldjenkolic acid	metab_11441	-	-	HMDB0029421	M+H	C9H16N2O5S2	2.3752	-	pos	-	-	-	-	Organic acids and derivatives	Carboxylic acids and derivatives	297.057	0.067802	-	53.6	-0.177561	-	Amino acids, peptides, and analogues	4.592	4.615	4.4575	4.4954	4.575	4.6183	5.5158	5.5872	5.5245	5.5355	5.5924	5.5621	5.2404	5.2752	5.2994
pos_11474	AK toxin I	metab_11458	-	-	HMDB0030401	M+ACN+H	C23H27NO6	2.3617	C16787	pos	-	-	-	-	Organic acids and derivatives	Carboxylic acids and derivatives	455.214	0.0532397	-	50.7	-8.27913	85146-09-4	Amino acids, peptides, and analogues	5.4547	5.4981	5.5859	5.4779	5.4979	5.5348	6.4239	6.4152	6.3728	6.3585	6.3968	6.3885	6.0836	6.1048	6.1297
pos_11719	Calligonine	metab_11702	-	-	-	M+H	C12H14N2	2.2329	C09089	pos	-	-	-	-	-	-	187.123	0.119844	54.2	-	-0.254743	-	-	5.5215	5.5398	5.4215	5.5964	5.5157	5.452	4.8092	4.9192	4.9832	4.9691	4.9058	4.8926	5.2306	5.3014	5.3349
pos_11733	Prolyl-Serine	metab_11716	-	-	HMDB0029026	M+H-2H2O	C8H14N2O4	2.226	-	pos	-	-	-	-	Organic acids and derivatives	Carboxylic acids and derivatives	167.082	0.0572425	-	70.4	0.0527631	-	Amino acids, peptides, and analogues	5.3362	5.3192	5.333	5.4113	5.3877	5.419	4.8435	4.8803	4.7721	4.8689	4.7567	4.8161	5.2301	5.2194	5.1821
pos_11804	15-Octadecene-9,11,13-triynoic acid	metab_11787	-	-	LMFA01030559;HMDB0032673	M+H-H2O	C18H22O2	2.1854	-	pos	-	-	-	-	Lipids and lipid-like molecules	Fatty Acyls	253.157	0.23908	-	50.4	-7.44353	-	Fatty acids and conjugates	5.1222	5.0968	5.1215	5.1302	5.5325	5.0792	3.778	4.3571	4.3395	3.7794	4.5449	4.5277	4.7444	4.9096	4.7343
pos_12043	Methylisopelletierine	metab_12026	map01110	Biosynthesis of secondary metabolites	HMDB0030326	M+NH4	C9H17NO	2.0703	C06184	pos	-	-	Metabolism	Global and overview maps	Organoheterocyclic compounds	Piperidines	173.165	0.0625595	-	62.7	0.195084	-	Not Available	6.3167	6.3576	6.3681	6.3654	6.3599	6.3887	6.0582	6.0811	6.117	6.1047	6.0542	6.0918	6.2457	6.2811	6.2997
pos_12180	Hovenidulcioside A2	metab_12163	-	-	HMDB0041029	M+H+Na	C38H58O12	2.0362	-	pos	-	-	-	-	Lipids and lipid-like molecules	Prenol lipids	365.193	0.0119122	-	50.2	-4.44658	171499-80-2	Terpene glycosides	6.3842	6.3495	6.3566	6.3451	6.3531	6.3401	5.8093	5.7536	5.8056	5.7976	5.7587	5.7858	6.2022	6.2109	6.2018
pos_12286	Blumenol C O-[rhamnosyl-(1->6)-glucoside]	metab_12269	-	-	HMDB0031935	M+2H	C25H42O11	1.9951	-	pos	-	-	-	-	Lipids and lipid-like molecules	Fatty Acyls	260.143	0.0762976	-	67.1	-3.78567	177261-67-5	Fatty acyl glycosides	5.5318	5.4976	5.4751	5.527	5.5292	5.5134	5.0426	5.0554	5.1974	5.0583	5.1095	5.0906	5.3443	5.3124	5.2779
pos_12404	16-iodo-hexadecanoic acid	metab_12387	-	-	LMFA01090039	M+H	C16H31IO2	1.9345	-	pos	-	-	-	-	-	-	383.145	0.0747621	55	-	2.00413	-	-	5.7122	5.7855	5.8043	5.7944	5.853	5.8077	5.5505	5.3941	5.4526	5.4238	5.5684	5.5344	5.6319	5.6558	5.591
pos_12492	Thymine	metab_12475	map00240;map01100	Pyrimidine metabolism; Metabolic pathways	HMDB0000262	M+H	C5H6N2O2	1.914	C00178	pos	Nucleic acids	Bases	Metabolism;Metabolism	Nucleotide metabolism;Global and overview maps	Organoheterocyclic compounds	Diazines	127.05	0.158069	93.9	-	1.18777	65-71-4	Pyrimidines and pyrimidine derivatives	4.3869	4.4851	4.508	4.4938	4.3912	4.5168	5.2261	5.2393	5.24	5.2268	5.1621	5.2094	4.8249	4.9279	4.9622
pos_12537	Arginyl-Proline	metab_12519	-	-	HMDB0028717	M+H-H2O	C11H21N5O3	1.8869	-	pos	-	-	-	-	Organic acids and derivatives	Carboxylic acids and derivatives	254.161	0.0428386	-	82.9	-0.524339	-	Amino acids, peptides, and analogues	8.0961	8.0623	8.0768	8.0849	8.1085	8.0889	7.7009	7.6785	7.7069	7.7015	7.6875	7.6921	7.9227	7.9599	7.9404
pos_12798	Pterine	metab_12780	-	-	HMDB0000802	M+H	C6H5N5O	1.7986	C00715	pos	-	-	-	-	Organoheterocyclic compounds	Pteridines and derivatives	164.057	0.0250692	69.8	-	0.052049	-	Pterins and derivatives	5.6817	5.6906	5.6905	5.6982	5.7132	5.7035	5.1947	5.159	5.2005	5.2129	5.1984	5.2392	5.5242	5.5338	5.512
pos_12810	1-(2-Furyl)butan-3-one	metab_12792	-	-	HMDB0032290	M+H-2H2O	C8H10O2	1.7917	-	pos	-	-	-	-	Organoheterocyclic compounds	Heteroaromatic compounds	103.055	0.0317242	-	63	2.88568	699-17-2	Not Available	5.4367	5.418	5.4401	5.4469	5.4618	5.4542	4.8531	4.7793	4.9024	4.8497	4.9672	4.8745	5.2339	5.2238	5.2065
pos_12857	Pilocarpic acid	metab_12839	-	-	-	M+H	C11H18N2O3	1.7312	-	pos	-	-	-	-	-	-	227.139	0.102687	55	-	0.17373	-	-	5.294	5.3057	5.3357	5.2636	5.3246	5.3229	4.0438	4.0442	4.0351	4.0451	4.0428	4.0841	4.8871	4.8356	4.799
pos_12859	(2S,3S)-2-amino-3-methylpentanoic acidL-Isoleucine	metab_12841	-	-	-	M+H	C6H13NO2	1.7312	-	pos	-	-	-	-	-	-	132.102	0.0700366	59.7	-	0.41432	-	-	8.1345	8.0981	8.1242	8.1268	8.136	8.1392	8.4971	8.4809	8.5165	8.4889	8.4703	8.5142	8.3063	8.3546	8.3642
pos_12975	Gamma-glutamyl-L-putrescine	metab_12957	map01100;map00330	Metabolic pathways; Arginine and proline metabolism	HMDB0012230	M+H-H2O	C9H19N3O3	1.553	C15699	pos	-	-	Metabolism;Metabolism	Global and overview maps;Amino acid metabolism	Organic acids and derivatives	Carboxylic acids and derivatives	200.139	0.0752689	-	53.3	-0.802859	-	Amino acids, peptides, and analogues	4.9688	4.8388	4.8376	4.8863	4.8385	4.7853	3.4625	3.6123	3.4539	3.5522	3.4616	3.4619	4.7283	4.6756	4.6703
pos_13031	ALANYL-dl-LEUCINE	metab_13013	-	-	-	M+H	C9H18N2O3	1.4515	-	pos	-	-	-	-	-	-	203.139	0.0886434	64.4	-	0.201239	-	-	6.4276	6.3867	6.3692	6.4058	6.4102	6.4027	6.2134	6.1792	6.2292	6.217	6.1957	6.2282	6.3695	6.3326	6.2923
pos_13049	Aspartyl-Arginine	metab_13031	-	-	HMDB0028747	M+H-H2O	C10H19N5O5	1.4242	-	pos	-	-	-	-	Organic acids and derivatives	Carboxylic acids and derivatives	272.135	0.0784364	-	51.4	-0.267327	-	Amino acids, peptides, and analogues	5.3505	5.2484	5.2616	5.2468	5.2798	5.2978	5.5258	5.5213	5.5289	5.4953	5.453	5.4679	5.4372	5.4851	5.4205
pos_13278	2-amino-4-{[2-({4-[3-(carboxymethyl)-4,6-dihydroxy-2-methoxyphenyl]-3-hydroxy-2-methylbutan-2-yl}sulfanyl)-1-[(carboxymethyl)-C-hydroxycarbonimidoyl]ethyl]-C-hydroxycarbonimidoyl}butanoic acid	metab_13259	-	-	HMDB0125503	M+CH3OH+H	C24H35N3O12S	1.1602	-	pos	-	-	-	-	Organic acids and derivatives	Carboxylic acids and derivatives	622.232	0.0440893	-	74.4	6.81807	-	Amino acids, peptides, and analogues	6.6461	6.6243	6.6431	6.649	6.6801	6.6839	6.9498	6.9634	6.9507	7.036	6.9834	6.9829	6.8182	6.8419	6.8563
pos_13322	Pyrroloquinoline quinone	metab_13303	-	-	HMDB0013636	M+H-H2O	C14H6N2O8	1.0803	C00113	pos	Vitamins and Cofactors	Cofactors	-	-	Organoheterocyclic compounds	Quinolines and derivatives	313.012	0.0635016	-	51.8	7.65082	72909-34-3	Pyrroloquinolines	5.0579	5.4239	5.3688	5.3993	5.4027	5.4725	5.0007	5.0257	4.5855	5.0313	5.1513	5.0158	5.1484	5.1782	5.2036
pos_13428	2-Methylfuran	metab_13409	-	-	HMDB0013749	M+H	C5H6O	1.0065	-	pos	-	-	-	-	Organoheterocyclic compounds	Heteroaromatic compounds	83.0498	0.0692902	70.8	-	7.54893	534-22-5	Not Available	4.9621	4.9709	4.937	4.9507	4.9924	4.9921	4.7121	4.7076	4.7302	4.7215	4.6822	4.6889	4.8396	4.869	4.8087
pos_13443	Pyrrolidine	metab_13424	-	-	HMDB0031641	M+H	C4H9N	0.9864	-	pos	-	-	-	-	Organoheterocyclic compounds	Pyrrolidines	72.0814	0.0612725	81.3	-	9.47575	123-75-1	Not Available	6.7588	6.7778	6.7726	6.7888	6.8073	6.8062	7.0832	7.0925	7.0701	7.1142	7.0926	7.099	6.9406	6.9762	6.9933
pos_13446	4-Acetamido-2-aminobutanoic acid	metab_13427	map01100;map00260;map01120	Metabolic pathways; Glycine, serine and threonine metabolism; Microbial metabolism in diverse environments	HMDB0031411	M+H-2H2O	C6H12N2O3	0.9795	C06442	pos	-	-	Metabolism;Metabolism;Metabolism	Global and overview maps;Amino acid metabolism;Global and overview maps	Organic acids and derivatives	Carboxylic acids and derivatives	125.071	0.0902814	-	77.3	1.17763	1190-46-1	Amino acids, peptides, and analogues	4.8282	4.8934	4.8607	4.7991	4.7295	4.7658	4.4402	4.632	4.5703	4.55	4.452	4.4538	4.6275	4.7061	4.6755
pos_13448	2-(hydroxymethyl)-Pyrimidine	metab_13429	-	-	-	M+H	C5H6N2O	0.9795	-	pos	-	-	-	-	-	-	111.056	0.156937	67.3	-	3.24413	-	-	4.9061	5.0077	5.0183	4.9746	4.9467	5.0055	4.6732	4.7805	4.6973	4.7164	4.7764	4.7186	4.7999	4.8253	4.9248
pos_13706	Pyrimidine	metab_13687	-	-	HMDB0003361	M+H	C4H4N2	0.6615	C00396	pos	-	-	-	-	Organoheterocyclic compounds	Diazines	81.0454	0.0899747	75.2	-	7.89419	25247-63-6	Pyrimidines and pyrimidine derivatives	5.2679	5.1907	5.2477	5.2071	5.2162	5.2231	4.7834	4.7464	4.8957	4.8145	4.8199	4.8372	5.0319	5.0921	5.1077
pos_1799	2-Hydroxycinnamic acid	metab_13998	map01100;map01110;map01120;map00360	Metabolic pathways; Biosynthesis of secondary metabolites; Microbial metabolism in diverse environments; Phenylalanine metabolism	HMDB0002641;HMDB0041592;HMDB0134028	M+H, M+NH4	C9H8O3	6.138	C05838;C01772	pos	-	-	Metabolism;Metabolism;Metabolism;Metabolism	Global and overview maps;Global and overview maps;Global and overview maps;Amino acid metabolism	Phenylpropanoids and polyketides	Cinnamic acids and derivatives	182.081	0.273556	72.7	-	0.152028	614-60-8	Hydroxycinnamic acids and derivatives	4.844	4.9373	4.7572	4.9508	4.8617	4.8848	4.7438	4.8155	4.7694	4.5339	4.4784	4.4611	4.8467	4.7525	4.601
pos_8472	Iaa	metab_14001	map01100;map00380	Metabolic pathways; Tryptophan metabolism	HMDB0002024;HMDB0000197;MJDBZSJ0000111	M+H	C10H9NO2	5.1232	C00954	pos	-	-	Metabolism;Metabolism	Global and overview maps;Amino acid metabolism	Organoheterocyclic compounds	Azoles	176.071	0.0231677	98.8	-	-0.210276	-	Imidazoles	6.5913	6.5611	6.573	6.6036	6.6041	6.5858	6.3403	6.3688	6.3797	6.3896	6.393	6.3392	6.4851	6.497	6.477
neg_95	4-Hydroxystyrene	metab_14102	-	-	HMDB0004072	M-H, M+FA-H, M-H2O-H	C8H8O	4.286	C05627	neg	-	-	-	-	Benzenoids	Benzene and substituted derivatives	165.055	0.0167823	-	74.9	-9.10419	2628-17-3	Styrenes	6.9811	6.9793	6.974	6.9523	6.9572	6.9511	7.1478	7.196	7.1867	7.2024	7.2678	7.1547	7.0881	7.0735	7.0809
neg_100	Indolelactic acid	metab_14107	-	-	HMDB0000671	M-H, 2M-H, M-H2O-H	C11H11NO3	4.5105	C02043	neg	-	-	-	-	Organoheterocyclic compounds	Indoles and derivatives	204.066	0.017189	97.4	-	-2.60057	7417-65-4	Indolyl carboxylic acids and derivatives	7.6111	7.6105	7.6028	7.5787	7.5854	7.5639	7.314	7.3173	7.2982	7.3056	7.285	7.3338	7.4855	7.4797	7.4945
neg_534	(R)-Pantothenic acid 4'-O-b-D-glucoside	metab_14541	-	-	HMDB0033965	M+Cl, M+K-2H	C15H27NO10	1.8115	-	neg	-	-	-	-	Lipids and lipid-like molecules	Fatty Acyls	418.111	0.169365	-	56.8	-3.448	29493-59-2	Fatty acyl glycosides	5.4668	5.5219	5.471	5.4103	5.4651	5.4397	5.1075	5.0585	5.1812	4.5401	5.1478	5.1765	5.4494	5.3002	5.3952
neg_537	3-Methyluridine	metab_14544	-	-	HMDB0004813	M+Na-2H, M+FA-H	C10H14N2O6	1.8256	-	neg	-	-	-	-	Nucleosides, nucleotides, and analogues	Pyrimidine nucleosides	303.084	0.0691103	-	58	1.25392	2140-69-4	Not Available	5.6549	5.6586	5.6161	5.6819	5.6273	5.5693	5.3931	5.4134	5.4061	5.4476	5.4226	5.4534	5.5949	5.5416	5.5945
neg_742	1H-Indole-3-carboxaldehyde	metab_14749	-	-	HMDB0029737	M-H, M+FA-H	C9H7NO	4.035	C08493	neg	-	-	-	-	Organoheterocyclic compounds	Indoles and derivatives	190.05	0.0311449	-	57.1	-6.52516	-	Indoles	6.1552	6.1446	6.1471	6.1005	6.1355	6.1204	5.8725	5.8536	5.8797	5.8828	5.8692	5.8791	6.0267	6.0275	6.0503
neg_1388	3-hydroxy-2-(2-hydroxypropan-2-yl)-6-(2-methylbut-3-en-2-yl)-2H,3H,7H-furo[3,2-g]chromen-7-one	metab_15392	-	-	HMDB0130295	M+FA-H, 2M+FA-H	C19H22O5	2.4476	-	neg	-	-	-	-	Phenylpropanoids and polyketides	Coumarins and derivatives	705.296	0.0585715	-	70.1	-9.53852	-	Furanocoumarins	6.0624	6.0664	6.0227	6.0134	6.0428	6.0161	5.8156	5.7523	5.8678	5.6898	5.7911	5.8288	5.9552	5.9886	6.0057
neg_1584	2-amino-4-({1-[(carboxymethyl)-C-hydroxycarbonimidoyl]-2-[(2,3-dihydroxy-2-pentyl-1-phenylpropyl)sulfanyl]ethyl}-C-hydroxycarbonimidoyl)butanoic acid	metab_15588	-	-	HMDB0126538	M-H2O-H, M+FA-H	C24H37N3O8S	2.9088	-	neg	-	-	-	-	Organic acids and derivatives	Carboxylic acids and derivatives	572.222	0.0306964	-	72.2	-7.48356	-	Amino acids, peptides, and analogues	5.4683	5.4141	5.3701	5.4014	5.3349	5.384	4.8391	5.0248	5.133	4.9052	4.7783	5.0518	5.2387	5.2649	5.2481
neg_1672	2-hydroxy-2-propan-2-ylbutanedioic acid	metab_15676	-	-	-	M-H2O-H, M-H	C7H12O5	3.1327	-	neg	-	-	-	-	-	-	175.06	0.0245894	97.8	-	-5.01453	-	-	6.8715	6.8652	6.8076	6.8612	6.8415	6.8385	6.6237	6.5988	6.6149	6.468	6.5901	6.6318	6.8	6.7787	6.7911
neg_2166	L-Homocitrulline	metab_16170	-	-	HMDB0000679;MJDBOTE0000607	M-H	C7H15N3O3	0.6704	C02427	neg	-	-	-	-	Organic acids and derivatives	Carboxylic acids and derivatives	188.104	0.0339287	87.1	-	-2.86864	-	Amino acids, peptides, and analogues	5.5879	5.5659	5.637	5.5514	5.5752	5.5725	5.1143	5.1246	5.2457	5.2988	5.2073	5.1575	5.4415	5.4287	5.4581
neg_2416	DL-Norvaline	metab_16419	-	-	HMDB0013716;MJDBOTE0000679	M-H	C5H11NO2	0.9857	C01799	neg	-	-	-	-	Organic acids and derivatives	Carboxylic acids and derivatives	116.071	0.0780247	85	-	-9.05539	-	Amino acids, peptides, and analogues	5.427	5.378	5.3588	5.351	5.3329	5.3317	5.6833	5.6455	5.7533	5.6529	5.6748	5.7117	5.5887	5.5209	5.5548
neg_2472	Simmondsin	metab_16475	-	-	HMDB0030394	2M-H	C16H25NO9	1.0346	-	neg	-	-	-	-	Organic oxygen compounds	Organooxygen compounds	749.297	0.12522	-	81.7	-2.37302	51771-52-9	Carbohydrates and carbohydrate conjugates	6.7426	6.7213	6.6735	6.6512	6.6861	6.6242	6.4445	6.3652	6.4952	6.4311	6.4099	6.4927	6.6935	6.596	6.6095
neg_2498	Uric Acid	metab_16501	map01100;map00230;map01120	Metabolic pathways; Purine metabolism; Microbial metabolism in diverse environments	HMDB0000289;MJDBOTE0001097	M-H	C5H4N4O3	1.0623	C00366	neg	-	-	Metabolism;Metabolism;Metabolism	Global and overview maps;Nucleotide metabolism;Global and overview maps	Organoheterocyclic compounds	Imidazopyrimidines	167.02	0.0979169	91.6	-	-4.61569	69-93-2	Purines and purine derivatives	5.4988	5.5211	5.7526	5.5463	5.5081	5.4713	5.2266	5.1132	5.1766	5.0961	5.1207	5.1755	5.4246	5.3524	5.3533
neg_2537	12-Oxo-20-trihydroxy-leukotriene B4	metab_16539	-	-	HMDB0012553;LMFA03020050	M-H	C20H30O7	1.123	-	neg	-	-	-	-	Lipids and lipid-like molecules	Fatty Acyls	381.189	0.185859	-	61.2	-6.23099	-	Eicosanoids	5.3565	5.2994	5.2712	5.2104	5.2717	5.1854	4.9225	4.8701	4.7602	5.0383	4.9743	4.7817	5.2485	5.089	5.1573
neg_2590	(2R,3R,4S,5R)-2-(6-aminopurin-9-yl)-5-(hydroxymethyl)oxolane-3,4-diol	metab_16592	map01100;map02010;map00230	Metabolic pathways; ABC transporters; Purine metabolism	HMDB0000050;MJDBWX000002266	M-H	C10H13N5O4	1.1845	C00212	neg	Nucleic acids	Nucleosides	Metabolism;Environmental Information Processing;Metabolism	Global and overview maps;Membrane transport;Nucleotide metabolism	Nucleosides, nucleotides, and analogues	Purine nucleosides	266.09	0.171635	81.2	-	0.457096	-	Not Available	5.0338	4.9595	4.8144	5.021	5.0046	5.0092	4.7583	4.7181	4.81	4.6556	4.7595	4.7898	4.941	4.8145	4.8199
neg_2638	N4-Acetylcytidine	metab_16640	-	-	HMDB0005923	M+FA-H	C11H15N3O6	1.2475	C22293	neg	-	-	-	-	Nucleosides, nucleotides, and analogues	Pyrimidine nucleosides	330.095	0.139264	-	62.6	1.05201	3768-18-1	Not Available	5.1763	5.2158	5.2309	5.1136	5.1115	5.0598	4.7805	4.8144	4.9516	5.1155	4.8486	4.8881	5.1415	5.0194	5.0959
neg_2668	Gamma-Glutamyl-beta-aminopropiononitrile	metab_16670	map00460	Cyanoamino acid metabolism	HMDB0060477	M-H	C8H13N3O3	1.2825	C06114	neg	-	-	Metabolism	Metabolism of other amino acids	Organic acids and derivatives	Carboxylic acids and derivatives	198.088	0.0757395	-	54.6	-2.25289	-	Amino acids, peptides, and analogues	4.9147	4.9501	5.0128	4.9296	4.9487	4.96	4.6826	4.7013	4.8161	4.7032	4.7762	4.8153	4.9143	4.8544	4.911
neg_2688	Uridine monophosphate (UMP)	metab_16690	-	-	-	M-H	C9H13N2O9P	1.3035	-	neg	-	-	-	-	-	-	323.029	0.112934	52.5	-	0.890451	-	-	5.559	5.6264	5.6126	5.5565	5.5424	5.5225	3.5349	3.5364	3.7048	3.5212	3.5457	3.5943	5.2402	5.1618	5.1539
neg_2727	8-iso-15-keto-PGE2	metab_16728	-	-	HMDB0002341;LMFA03110009	M+FA-H	C20H30O5	1.393	-	neg	-	-	-	-	Lipids and lipid-like molecules	Fatty Acyls	395.205	0.226578	-	51.7	-7.12677	914804-63-0	Eicosanoids	5.3169	5.278	5.1266	5.1847	5.1394	5.0562	5.9276	5.8793	5.9964	5.7908	5.9087	5.9698	5.8154	5.6137	5.7387
neg_2861	(S)-Spinacine	metab_16862	-	-	HMDB0029873	3M-H	C7H9N3O2	1.6715	-	neg	-	-	-	-	Organic acids and derivatives	Carboxylic acids and derivatives	500.2	0.133627	-	53.6	-1.77083	59981-63-4	Amino acids, peptides, and analogues	5.9687	5.9638	5.9751	5.9017	5.9131	5.8985	5.5589	5.6167	5.6754	5.9664	5.6219	5.6693	5.923	5.8345	5.8185
neg_3198	Pentosidine	metab_17199	-	-	HMDB0003933	M+K-2H	C17H26N6O4	1.9027	-	neg	-	-	-	-	Organic acids and derivatives	Carboxylic acids and derivatives	415.147	0.0271831	-	54.7	-7.20876	124505-87-9	Amino acids, peptides, and analogues	6.4825	6.4523	6.4425	6.4832	6.4756	6.4525	6.2246	6.205	6.2369	6.1485	6.226	6.2297	6.3634	6.3481	6.3714
neg_3293	Pyrroline hydroxycarboxylic acid	metab_17294	map01100;map00330	Metabolic pathways; Arginine and proline metabolism	HMDB0001369	3M-H	C5H7NO3	1.9521	C04281	neg	-	-	Metabolism;Metabolism	Global and overview maps;Amino acid metabolism	Organic acids and derivatives	Carboxylic acids and derivatives	386.121	0.024043	-	70.8	1.08335	22573-88-2	Amino acids, peptides, and analogues	6.6844	6.675	6.6784	6.6665	6.703	6.6496	6.3465	6.3313	6.3894	6.3037	6.3711	6.3893	6.5554	6.5352	6.5501
neg_3302	6-(4-{5,7-dihydroxy-3-[(2Z)-4-hydroxy-3-(4-methylpent-3-en-1-yl)but-2-en-1-yl]-6-(3-methylbut-2-en-1-yl)-4-oxo-3,4-dihydro-2H-1-benzopyran-2-yl}-3-hydroxyphenoxy)-3,4,5-trihydroxyoxane-2-carboxylic acid	metab_17303	-	-	HMDB0129798	M+FA-H	C36H44O13	1.9521	-	neg	-	-	-	-	Phenylpropanoids and polyketides	Flavonoids	729.271	0.0671235	-	69.3	-7.61921	-	Flavonoid glycosides	6.7324	6.752	6.725	6.7623	6.7435	6.6827	6.5274	6.487	6.5366	6.5125	6.5192	6.5425	6.6675	6.6139	6.6631
neg_3331	Licoricesaponin E2	metab_17332	-	-	HMDB0038719	M+K-2H	C42H60O16	1.966	-	neg	-	-	-	-	Lipids and lipid-like molecules	Prenol lipids	857.33	0.058174	-	60.8	-8.60772	119418-01-8	Terpene glycosides	6.3319	6.3737	6.4248	6.3434	6.3417	6.237	6.139	6.0576	6.1596	6.2047	6.1089	6.1388	6.2811	6.2308	6.2532
neg_3517	(2S)-2-amino-3-phenylpropanoic acidL-Phenylalanine	metab_17517	-	-	-	M-H	C9H11NO2	2.0852	-	neg	-	-	-	-	-	-	164.071	0.0422732	94.4	-	-4.86777	-	-	6.3027	6.2877	6.2744	6.3274	6.3148	6.3144	6.6724	6.6875	6.6776	6.6446	6.6968	6.7134	6.5364	6.526	6.5614
neg_3556	3,4,5-trihydroxy-6-{[(2E)-2-methyl-3-phenylprop-2-en-1-yl]oxy}oxane-2-carboxylic acid	metab_17556	-	-	HMDB0133619	M+Na-2H	C16H20O7	2.0922	-	neg	-	-	-	-	Lipids and lipid-like molecules	Fatty Acyls	345.094	0.0118724	-	51.7	-4.24248	-	Fatty acyl glycosides	7.0117	7.0279	6.9784	7.0614	7.049	7.0237	6.6308	6.6378	6.6228	6.5582	6.6287	6.6348	6.9202	6.9136	6.9238
neg_3748	Pisumoside A	metab_17748	-	-	HMDB0037126	M+Na-2H	C38H62O21	2.2106	-	neg	-	-	-	-	Organic acids and derivatives	Thiocarboxylic acids and derivatives	875.355	0.0600246	-	65.1	2.62812	333334-42-2	Thioesters	6.5843	6.5546	6.5868	6.5711	6.5863	6.5574	6.1028	6.1309	6.1211	6.2163	6.1557	6.1725	6.4171	6.4585	6.4114
neg_3775	Goshonoside F3	metab_17775	-	-	HMDB0038376	M+FA-H	C32H52O13	2.2316	-	neg	-	-	-	-	Lipids and lipid-like molecules	Prenol lipids	689.337	0.134754	-	65.9	-2.88457	90851-26-6	Terpene glycosides	5.916	5.9669	5.4741	5.921	5.875	5.8337	5.6017	5.5766	5.3727	5.7193	5.4969	5.4815	5.7844	5.9022	5.848
neg_3804	Leucylproline	metab_17804	-	-	HMDB0011175	M-H	C11H20N2O3	2.2591	-	neg	-	-	-	-	Organic acids and derivatives	Carboxylic acids and derivatives	227.14	0.0094286	-	67.8	-1.14643	6403-35-6	Amino acids, peptides, and analogues	6.1093	6.1026	6.1284	6.1574	6.1553	6.1422	5.8184	5.8313	5.7783	5.8646	5.8217	5.7983	5.9661	5.9635	5.9716
neg_3971	Tetrahydroharmol	metab_17971	-	-	HMDB0029835	M+FA-H	C12H14N2O	2.3638	-	neg	-	-	-	-	Alkaloids and derivatives	Harmala alkaloids	247.109	0.0536724	-	76.3	-0.422215	17952-75-9	Not Available	5.3361	5.2948	5.2616	5.2718	5.3019	5.2938	4.8855	4.8778	4.8613	4.7832	4.8166	4.9066	5.1583	5.2049	5.1857
neg_4009	Alpha-Trisaccharide	metab_18009	-	-	HMDB0006595	M-H	C20H37NO14	2.3918	-	neg	-	-	-	-	Organic oxygen compounds	Organooxygen compounds	514.216	0.0324568	-	62.9	4.18664	49777-13-1	Carbohydrates and carbohydrate conjugates	5.9799	5.9815	5.9544	5.9238	5.9583	5.9355	5.7208	5.7179	5.7571	5.6928	5.7591	5.7661	5.8841	5.8572	5.8642
neg_4039	Tryptophyl-Gamma-glutamate	metab_18039	-	-	HMDB0029097	2M-H	C16H20N4O4	2.4058	-	neg	-	-	-	-	Organic acids and derivatives	Carboxylic acids and derivatives	663.285	0.039375	-	65	-6.8756	-	Amino acids, peptides, and analogues	6.5938	6.5772	6.5968	6.5796	6.5948	6.5686	5.9398	5.9298	6.0002	5.8433	5.9181	6.0118	6.4051	6.3966	6.4293
neg_4137	Glycylprolylhydroxyproline	metab_18137	-	-	HMDB0002171	2M-H	C12H19N3O5	2.4825	-	neg	-	-	-	-	Organic acids and derivatives	Carboxylic acids and derivatives	569.258	0.0148233	-	83.3	1.22534	2239-67-0	Amino acids, peptides, and analogues	7.033	7.0214	7.0428	7.0243	7.0403	7.0459	6.8303	6.8034	6.8263	6.8003	6.8179	6.8537	6.9558	6.9669	6.9671
neg_4209	Morphiceptin	metab_18208	-	-	HMDB0005777	M+FA-H	C28H35N5O5	2.5388	-	neg	-	-	-	-	Organic acids and derivatives	Carboxylic acids and derivatives	566.259	0.0689506	-	81.8	-5.81247	74135-04-9	Amino acids, peptides, and analogues	5.1165	5.1907	5.0159	5.0144	5.1608	5.0811	5.9473	5.9466	5.9885	5.8032	5.9701	5.9591	5.6806	5.7318	5.6813
neg_4228	(2S)-2-amino-3-(4-hydroxyphenyl)propanoic acid	metab_18227	map01100;map01110;map00350;map00730;map00130;map01210;map00998;map01230;map00680;map00460;map00360;map00261;map00970;map01055;map00400;map00401;map01059	Metabolic pathways; Biosynthesis of secondary metabolites; Tyrosine metabolism; Thiamine metabolism; Ubiquinone and other terpenoid-quinone biosynthesis; 2-Oxocarboxylic acid metabolism; Biosynthesis of various secondary metabolites - part 2; Biosynthesis of amino acids; Methane metabolism; Cyanoamino acid metabolism; Phenylalanine metabolism; Monobactam biosynthesis; Aminoacyl-tRNA biosynthesis;…	HMDB0000158;MJDBWX000002107	M-H	C9H11NO3	2.5528	C00082	neg	Peptides	Amino acids	Metabolism;Metabolism;Metabolism;Metabolism;Metabolism;Metabolism;Metabolism;Metabolism;Metabolism;Metabolism;Metabolism;Metabolism;Genetic Information Processing;Metabolism;Metabolism;Metabolism;Metabolism	Global and overview maps;Global and overview maps;Amino acid metabolism;Metabolism of cofactors and vitamins;Metabolism of cofactors and vitamins;Global and overview maps;Biosynthesis of other secondary metabolites;Global and overview maps;Energy metabolism;Metabolism of other amino acids;Amino acid metabolism;Biosynthesis of other secondary metabolites;Translation;Metabolism of terpenoids and po…	Organic acids and derivatives	Carboxylic acids and derivatives	180.066	0.048215	94.1	-	-3.60019	60-18-4	Amino acids, peptides, and analogues	5.7946	5.825	5.8303	5.7795	5.8004	5.798	5.5411	5.5417	5.5978	5.5463	5.571	5.5949	5.7119	5.7507	5.7461
neg_4377	Isoleucyl-Asparagine	metab_18376	-	-	HMDB0028902	M-H2O-H	C10H19N3O4	2.6506	-	neg	-	-	-	-	Organic acids and derivatives	Carboxylic acids and derivatives	226.119	0.0381535	-	78.7	-0.876864	-	Amino acids, peptides, and analogues	5.8096	5.827	5.8434	5.8031	5.8362	5.8127	5.3756	5.3767	5.4091	5.453	5.3666	5.4476	5.672	5.6967	5.7038
neg_4425	Sonchuionoside C	metab_18424	-	-	HMDB0035212	M+FA-H	C19H30O8	2.6786	-	neg	-	-	-	-	Lipids and lipid-like molecules	Prenol lipids	431.19	0.0759636	-	67.3	-6.13899	126585-76-0	Terpene glycosides	5.8384	5.931	6.0398	5.9637	5.9647	6.0022	5.0332	5.0397	5.1201	5.3024	5.1171	5.1946	5.7398	5.8057	5.7814
neg_4485	Prolylphenylalanine	metab_18484	-	-	HMDB0011179	M-H	C14H18N2O3	2.7205	-	neg	-	-	-	-	Organic acids and derivatives	Carboxylic acids and derivatives	261.124	0.0162333	-	61.4	0.128396	13589-02-1	Amino acids, peptides, and analogues	5.149	5.1709	5.1783	5.1405	5.194	5.1655	5.4912	5.5394	5.5314	5.538	5.5066	5.5654	5.3819	5.3959	5.3906
neg_4540	Hydroxyprolyl-Hydroxyproline	metab_18539	-	-	HMDB0028864	2M+FA-H	C10H16N2O5	2.7623	-	neg	-	-	-	-	Organic acids and derivatives	Carboxylic acids and derivatives	533.211	0.138366	-	64.8	1.47761	-	Amino acids, peptides, and analogues	5.6365	5.647	5.5861	5.4467	5.5878	5.4143	5.249	5.1637	5.3512	4.4407	5.1472	5.1599	5.5725	5.4721	5.4718
neg_4751	Periandrin V	metab_18750	-	-	HMDB0039591	M+Na-2H	C41H62O14	2.9158	-	neg	-	-	-	-	Lipids and lipid-like molecules	Prenol lipids	799.386	0.017405	-	80.4	-2.90748	-	Terpene glycosides	6.5784	6.5656	6.6037	6.5658	6.577	6.5649	6.2801	6.326	6.3279	6.311	6.3098	6.3445	6.4895	6.4865	6.5008
neg_4756	Hydroxyprolyl-Proline	metab_18755	-	-	HMDB0028871	2M+FA-H	C10H16N2O4	2.9228	-	neg	-	-	-	-	Organic acids and derivatives	Carboxylic acids and derivatives	501.221	0.0278686	-	72.9	1.57132	-	Amino acids, peptides, and analogues	5.4498	5.3434	5.4492	5.372	5.4365	5.4084	6.0318	6.0366	6.0752	5.9235	6.106	6.1527	5.8488	5.8624	5.873
neg_4767	Retrofractamide A	metab_18766	-	-	HMDB0033447	M+Na-2H	C20H25NO3	2.9298	-	neg	-	-	-	-	Organoheterocyclic compounds	Benzodioxoles	348.157	0.0709023	-	65.1	-4.03291	94079-67-1	Not Available	4.1729	4.3557	4.3542	4.4479	4.3457	4.3633	5.1822	5.2187	5.1765	5.335	5.238	5.2949	4.9664	5.0248	4.981
neg_4934	Gamma-Glutamylphenylalanine	metab_18933	-	-	HMDB0000594	M-H	C14H18N2O5	3.0629	-	neg	-	-	-	-	Organic acids and derivatives	Carboxylic acids and derivatives	293.115	0.0489713	-	79.8	0.91585	7432-24-8	Amino acids, peptides, and analogues	4.8875	4.9169	4.8832	4.822	4.8954	4.8925	5.1567	5.1269	5.1879	5.2199	5.1947	5.2058	5.0639	5.0925	5.1059
neg_5068	4,8,9-trihydroxy-17-methoxy-2-oxatricyclo[13.2.2.1?,?]icosa-1(17),3,5,7(20),15,18-hexaen-10-one	metab_19067	-	-	HMDB0133427	M+FA-H	C20H22O6	3.1745	-	neg	-	-	-	-	Phenylpropanoids and polyketides	Diarylheptanoids	403.136	0.0629236	-	74.3	-9.54813	-	Cyclic diarylheptanoids	5.8674	5.6666	5.8617	5.4878	5.6173	5.6073	4.5525	3.8767	4.5871	4.587	4.7246	4.6417	5.5676	5.5181	5.5246
neg_5255	N-Jasmonoylisoleucine	metab_19254	-	-	HMDB0029391	M+Na-2H	C18H29NO4	3.3005	C18699	neg	-	-	-	-	Organic acids and derivatives	Carboxylic acids and derivatives	344.183	0.0623349	-	54.9	-4.31614	120330-93-0	Amino acids, peptides, and analogues	5.0226	4.9254	5.0008	4.9206	4.9696	4.9019	5.1854	5.2299	5.2372	5.2412	5.2356	5.256	5.106	5.1323	5.1602
neg_5595	4'-Hydroxycarvedilol	metab_19594	-	-	HMDB0013947	2M+FA-H	C24H26N2O5	3.5381	-	neg	-	-	-	-	Organoheterocyclic compounds	Indoles and derivatives	889.364	0.0242684	-	64.3	-3.27734	-	Carbazoles	6.5034	6.4314	6.4379	6.4606	6.4571	6.4454	5.9674	5.9543	5.9366	5.8345	5.941	5.9525	6.3022	6.3219	6.3188
neg_5612	Prolylhydroxyproline	metab_19611	-	-	HMDB0006695	2M+FA-H	C10H16N2O4	3.5591	-	neg	-	-	-	-	Organic acids and derivatives	Carboxylic acids and derivatives	501.221	0.0148661	-	80.6	1.50286	18684-24-7	Amino acids, peptides, and analogues	4.518	4.0646	4.1232	3.7738	3.7839	3.8698	5.2521	5.2124	5.3232	4.9733	5.2509	5.376	4.9946	4.9865	4.9993
neg_5801	Tyrosyl-Hydroxyproline	metab_19800	-	-	HMDB0029106	M-H	C14H18N2O5	3.6857	-	neg	-	-	-	-	Organic acids and derivatives	Carboxylic acids and derivatives	293.115	0.0585742	-	69.2	0.815083	-	Amino acids, peptides, and analogues	5.0862	5.041	5.1037	5.07	5.0775	5.0806	5.3523	5.3846	5.3431	5.3701	5.3475	5.3862	5.2341	5.2197	5.1841
neg_5802	Sclareapinone	metab_19801	-	-	HMDB0030645	2M+FA-H	C20H24O4	3.6857	-	neg	-	-	-	-	Benzenoids	Naphthalenes	701.337	0.0721362	-	85.5	6.57457	189155-46-2	Naphthoquinones	5.0179	4.9013	4.7692	4.5904	4.8725	4.6063	5.5303	5.5582	5.5833	5.2997	5.46	5.628	5.3172	5.3041	5.2566
neg_5805	Succinylacetone	metab_19804	-	-	HMDB0000635	M-H	C7H10O4	3.6927	-	neg	-	-	-	-	Organic acids and derivatives	Keto acids and derivatives	157.05	0.0378389	-	57.3	-5.56947	51568-18-4	Medium-chain keto acids and derivatives	5.7054	5.6333	5.6495	5.6499	5.6641	5.6509	5.4368	5.4221	5.4409	5.3412	5.441	5.4791	5.5691	5.5983	5.5712
neg_5806	Blennin B	metab_19805	-	-	HMDB0037528	M+Na-2H	C15H20O4	3.6927	-	neg	-	-	-	-	Lipids and lipid-like molecules	Prenol lipids	285.109	0.0492753	-	61.8	-5.49238	62824-37-7	Terpene lactones	4.8779	4.9374	4.9655	4.8876	4.9358	4.8876	4.5792	4.6812	4.5574	4.5817	4.566	4.6754	4.7837	4.7858	4.8213
neg_5830	DIPROTIN A	metab_19829	-	-	-	M-H	C17H31N3O4	3.7138	-	neg	-	-	-	-	-	-	340.224	0.0295491	86.5	-	0.334595	-	-	4.3057	4.4078	4.5376	4.5518	4.4554	4.5477	6.1353	6.19	6.1048	6.2106	6.1863	6.1624	5.7624	5.7872	5.7811
neg_5990	Coutaric acid	metab_19988	-	-	HMDB0029225	2M+FA-H	C18H27N3O4	3.8468	C01327	neg	-	-	-	-	Benzenoids	Benzene and substituted derivatives	743.396	0.0817911	-	60	-3.78176	-	Benzoic acids and derivatives	6.1074	6.092	5.9465	6.1213	6.0991	6.0757	4.3525	4.1397	4.7712	2.3425	3.9624	2.8113	5.778	5.8489	5.8239
neg_6062	3-methyl-2-[(5-oxopyrrolidine-2-carbonyl)amino]pentanoic acid	metab_20060	-	-	-	M-H	C11H18N2O4	3.9166	-	neg	-	-	-	-	-	-	241.119	0.0183128	74	-	-0.391461	-	-	5.8036	5.7995	5.8398	5.8266	5.8029	5.8033	5.2465	5.234	5.2152	5.2753	5.2489	5.247	5.6118	5.6253	5.626
neg_6161	Capsianoside III	metab_20159	-	-	HMDB0031891	M-2H	C50H84O26	4.0211	-	neg	-	-	-	-	Lipids and lipid-like molecules	Prenol lipids	549.255	0.022358	-	64.1	-0.876334	121961-81-7	Terpene glycosides	6.0182	6.0536	6.049	5.9595	6.0615	5.9875	5.7724	5.8054	5.7934	5.8825	5.7597	5.8117	5.9449	5.9255	5.9347
neg_6200	Hordatine B glucoside	metab_20198	-	-	HMDB0030460	M+FA-H	C35H50N8O10	4.049	-	neg	-	-	-	-	Phenylpropanoids and polyketides	2-arylbenzofuran flavonoids	787.364	0.0553902	-	88.5	1.04667	-	Not Available	5.9176	5.8789	5.9145	5.7906	5.9361	5.8135	5.113	5.1133	5.3671	5.0916	5.0855	5.2683	5.7086	5.7562	5.7411
neg_6283	Oleragenoside	metab_20281	-	-	HMDB0036943	M+FA-H	C42H64O16	4.1118	-	neg	-	-	-	-	Lipids and lipid-like molecules	Prenol lipids	869.417	0.197991	-	71.1	-0.735208	274677-98-4	Terpene glycosides	5.7036	5.6789	5.7024	5.7277	5.6994	5.6454	5.914	5.8914	5.9373	5.8688	5.9219	5.9708	5.8065	5.6505	5.8135
neg_6289	(R)-6'-O-(4-Geranyloxy-2-hydroxycinnamoyl)-marmin	metab_20287	-	-	HMDB0039061	M+Na-2H	C38H46O8	4.1188	-	neg	-	-	-	-	Phenylpropanoids and polyketides	Coumarins and derivatives	651.3	0.114277	-	71.4	9.99288	142628-36-2	Furanocoumarins	6.4425	6.4333	6.4597	6.4389	6.418	6.455	6.1879	6.1926	6.1801	6.1832	6.2178	6.2062	6.3372	6.2427	6.3248
neg_6629	S-(11-hydroxy-9-deoxy-delta12-PGD2)-glutathione	metab_20626	-	-	HMDB0013055	M-H2O-H	C30H51N3O10S	4.4264	-	neg	-	-	-	-	Organic acids and derivatives	Carboxylic acids and derivatives	626.316	0.0259953	-	68.5	6.98754	-	Amino acids, peptides, and analogues	5.9708	5.9749	5.9514	5.9401	5.9767	5.9254	5.7096	5.6299	5.6686	5.5596	5.6772	5.6673	5.8343	5.8477	5.8568
neg_6666	CDP-DG(18:0/18:0)	metab_20663	-	-	LMGP13010013;HMDB0006978	M-H2O-H	C48H89N3O15P2	4.4548	-	neg	-	-	-	-	Lipids and lipid-like molecules	Glycerophospholipids	990.564	0.0607508	-	62.7	4.50362	-	CDP-glycerols	5.9137	5.9219	5.8724	5.9408	5.8549	5.8865	5.5057	5.3625	5.5116	5.3853	5.4297	5.3507	5.7495	5.7236	5.7764
neg_6705	Indoleacetaldehyde	metab_20702	map01100;map00380	Metabolic pathways; Tryptophan metabolism	HMDB0001190	M-H	C10H9NO	4.5105	C00637	neg	-	-	Metabolism;Metabolism	Global and overview maps;Amino acid metabolism	Organoheterocyclic compounds	Indoles and derivatives	158.06	0.0326652	-	75	-5.65627	2591-98-2	Indoles	6.0133	6.0216	6.0035	5.9737	5.9932	5.9715	5.7061	5.7125	5.723	5.7049	5.6983	5.7278	5.8883	5.88	5.9075
neg_6719	3-(4-hydroxyphenyl)-N-(4-oxobutyl)prop-2-enimidic acid	metab_20716	-	-	HMDB0139876	M+FA-H	C13H15NO3	4.5175	-	neg	-	-	-	-	Phenylpropanoids and polyketides	Cinnamic acids and derivatives	278.103	0.0268862	-	68	0.158368	-	Hydroxycinnamic acids and derivatives	6.1383	6.1182	6.0924	6.073	6.0863	6.0561	5.7863	5.794	5.7539	5.6833	5.7473	5.8121	5.9807	5.9576	5.9663
neg_6792	3,4,5-trihydroxy-6-[3-hydroxy-2-(4-hydroxy-3-methylbut-2-en-1-yl)phenoxy]oxane-2-carboxylic acid	metab_20789	-	-	HMDB0126241	M-H2O-H	C17H22O9	4.5875	-	neg	-	-	-	-	Organic oxygen compounds	Organooxygen compounds	351.106	0.036507	-	53.9	-7.67532	-	Carbohydrates and carbohydrate conjugates	5.5036	5.556	5.4594	5.4788	5.4558	5.4258	5.1604	5.1435	5.152	5.1013	5.2002	5.0958	5.3438	5.3249	5.3566
neg_6941	Fumitremorgin B	metab_20938	map01100;map01110;map00404	Metabolic pathways; Biosynthesis of secondary metabolites; Staurosporine biosynthesis	HMDB0030203	M+Na-2H	C27H33N3O5	4.721	C20630	neg	-	-	Metabolism;Metabolism;Metabolism	Global and overview maps;Global and overview maps;Biosynthesis of other secondary metabolites	Organoheterocyclic compounds	Indoles and derivatives	500.216	0.112171	-	61.3	-1.32563	12626-17-4	Carbazoles	5.1918	5.1007	5.1917	5.0764	5.1583	5.0703	4.834	4.9553	4.864	4.8584	4.7885	4.9472	4.9617	5.0491	5.0493
neg_7025	Cheirotoxol	metab_21022	-	-	HMDB0030076	M+Cl	C35H54O15	4.8185	-	neg	-	-	-	-	Lipids and lipid-like molecules	Steroids and steroid derivatives	749.316	0.086491	-	75.3	0.142793	-	Steroid lactones	6.0819	6.087	5.9549	6.0138	5.9535	5.9533	5.2452	5.0337	5.3628	4.164	5.2581	5.2695	5.8805	5.8055	5.8548
neg_7161	3,7,11,15,23-Pentaoxolanost-8-en-26-oic acid	metab_21158	-	-	HMDB0035980	2M-H	C30H40O7	4.9445	-	neg	-	-	-	-	Lipids and lipid-like molecules	Prenol lipids	1023.55	0.0127605	-	74.3	5.80924	98665-14-6	Triterpenoids	6.184	6.1604	6.0965	6.1001	6.0807	5.9584	5.6815	5.6404	5.7498	5.6132	5.5152	5.7018	5.9615	5.9725	5.9681
neg_7186	Quinquenoside I	metab_21183	-	-	HMDB0032814	M+Na-2H	C52H86O19	4.9859	-	neg	-	-	-	-	Lipids and lipid-like molecules	Prenol lipids	1035.55	0.0468654	-	81.6	-2.32966	208764-50-5	Triterpenoids	6.6507	6.6071	6.5825	6.595	6.6251	6.5478	5.0487	4.9549	5.3295	4.7449	5.2646	5.3195	6.3576	6.3378	6.3168
neg_7228	Merodesmosine	metab_21225	-	-	HMDB0030407	M+Na-2H	C18H34N4O6	5.0564	-	neg	-	-	-	-	Organic acids and derivatives	Carboxylic acids and derivatives	423.225	0.026331	-	67.5	6.85408	17096-97-8	Amino acids, peptides, and analogues	5.3585	5.3521	5.3445	5.3456	5.369	5.2827	5.0765	5.0596	5.1993	5.1652	5.1565	5.1549	5.2848	5.2671	5.2637
neg_7264	L-phenylalanyl-L-hydroxyproline	metab_21261	-	-	HMDB0011176	M-H2O-H	C14H18N2O4	5.0984	-	neg	-	-	-	-	Organic acids and derivatives	Carboxylic acids and derivatives	259.109	0.00401812	-	64.2	0.109581	-	Amino acids, peptides, and analogues	5.9254	5.8987	5.9024	5.9038	5.912	5.8893	5.6758	5.6903	5.6971	5.6728	5.7087	5.7015	5.8064	5.8057	5.8031
neg_7360	2-Octenedioic acid	metab_21357	-	-	HMDB0000341;LMFA01170085	M-H2O-H	C8H12O4	5.1971	-	neg	-	-	-	-	Lipids and lipid-like molecules	Fatty Acyls	153.055	0.131552	-	56.2	-5.08319	5698-50-0	Fatty acids and conjugates	2.4433	2.4505	3.6069	2.428	2.6015	3.2618	4.2691	4.1006	4.2183	3.9318	4.2864	4.3006	3.4849	3.5903	3.5861
neg_7361	Sarmentosin	metab_21358	-	-	HMDB0030697	M+Na-2H	C11H17NO7	5.1971	C08340	neg	-	-	-	-	Lipids and lipid-like molecules	Fatty Acyls	296.078	0.00590677	-	81.5	9.40468	71933-54-5	Fatty acyl glycosides	3.7024	3.9137	3.6453	3.5342	3.503	3.1931	4.7632	4.6173	4.6987	4.4014	4.7659	4.5486	4.3607	4.3657	4.364
neg_7391	Tryptophyl-Glutamate	metab_21388	-	-	HMDB0029082	M-H2O-H	C16H19N3O5	5.2531	-	neg	-	-	-	-	Organic acids and derivatives	Carboxylic acids and derivatives	314.115	0.119515	-	59	0.983077	-	Amino acids, peptides, and analogues	5.009	5.009	5.0885	5.0322	5.0655	5.0216	4.6427	4.6093	4.6959	4.5672	4.7933	4.7046	4.9329	4.8525	4.9541
neg_7430	Alanyl-Tyrosine	metab_21427	-	-	HMDB0028699	2M-H	C12H16N2O4	5.2957	-	neg	-	-	-	-	Organic acids and derivatives	Carboxylic acids and derivatives	503.216	0.0120174	-	60.6	1.56905	-	Amino acids, peptides, and analogues	5.3014	5.3542	5.3307	5.2866	5.2735	5.2899	5.0858	5.0708	5.1168	5.0289	5.1008	5.0841	5.2459	5.2499	5.2395
neg_7447	4'-Hydroxy-5,5'-diisopropyl-2,2'-dimethyl-3,4-biphenylquinone	metab_21444	-	-	HMDB0040761	2M+FA-H	C20H24O3	5.3097	-	neg	-	-	-	-	Lipids and lipid-like molecules	Prenol lipids	669.348	0.0185973	-	54.8	7.34129	120866-13-9	Monoterpenoids	6.4694	6.4793	6.3986	6.404	6.3585	6.3278	5.8586	5.8326	5.9118	5.6819	5.8056	5.8152	6.233	6.2317	6.2462
neg_7472	Hydroxyl frovatriptan	metab_21469	-	-	HMDB0061150	M+FA-H	C14H19N3O2	5.3377	-	neg	-	-	-	-	Organoheterocyclic compounds	Indoles and derivatives	306.146	0.078348	-	61.1	0.826132	-	Carbazoles	4.6039	4.5871	4.498	4.6033	4.5388	4.5358	4.833	4.8233	4.8446	4.8264	4.8193	4.8095	4.7533	4.731	4.6856
neg_7503	Oleanolic acid 3-[rhamnosyl-(1->4)-glucosyl-(1->6)-glucoside]	metab_21500	-	-	HMDB0040860	M+Cl	C48H78O17	5.3727	-	neg	-	-	-	-	Lipids and lipid-like molecules	Prenol lipids	961.501	0.028189	-	84.7	8.25926	160845-07-8	Terpene glycosides	6.8062	6.7769	6.7697	6.7911	6.7612	6.7441	6.4031	6.4165	6.4629	6.3541	6.459	6.3867	6.6641	6.6777	6.6533
neg_7572	Deoxycholic acid 3-glucuronide	metab_21569	map01100;map00040	Metabolic pathways; Pentose and glucuronate interconversions	HMDB0002596;LMST05010046	M+Na-2H	C30H48O10	5.4576	C03033	neg	-	-	Metabolism;Metabolism	Global and overview maps;Carbohydrate metabolism	Lipids and lipid-like molecules	Steroids and steroid derivatives	589.304	0.0579319	-	65.8	8.71486	72504-58-6	Steroidal glycosides	3.8983	4.0456	3.8946	3.9328	3.7077	3.4551	3.5885	2.6512	2.9777	3.745	3.6149	3.5328	5.4976	5.4747	5.4472
neg_7836	3,6-dihydroxy-4-(3-hydroxyphenyl)-1-methyl-5-phenylpiperidin-2-one	metab_21833	-	-	HMDB0134794	M-H	C18H19NO4	5.7339	-	neg	-	-	-	-	Phenylpropanoids and polyketides	Stilbenes	312.124	0.031371	-	56	0.917623	-	Not Available	6.4369	6.4241	6.4132	6.4298	6.4215	6.4131	6.2058	6.2108	6.2223	6.1603	6.2543	6.2273	6.3283	6.3541	6.3494
neg_7852	4-Methylhippuric acid	metab_21849	-	-	HMDB0013292	M-H	C10H11NO3	5.7479	-	neg	-	-	-	-	Benzenoids	Benzene and substituted derivatives	192.066	0.113657	63.7	-	-2.9523	-	Benzoic acids and derivatives	4.044	4.0404	3.9961	4.0916	4.0733	3.9907	4.2565	4.244	4.2618	4.187	4.2683	4.2076	4.0836	4.1556	4.0642
neg_8176	Glutamylproline	metab_22173	-	-	HMDB0028827	M+Cl	C10H16N2O5	5.9809	-	neg	-	-	-	-	Organic acids and derivatives	Carboxylic acids and derivatives	279.078	0.104415	-	54.3	9.65849	41745-47-5	Amino acids, peptides, and analogues	3.0462	3.0769	2.9697	3.1024	3.0302	2.9498	4.9034	4.9671	4.9583	4.6086	4.8132	4.8793	4.5197	4.5189	4.5957
neg_8285	7-ketodeoxycholic acid	metab_22281	-	-	HMDB0000391;MJDBDZS0000043	M-H	C24H38O5	6.0716	-	neg	-	-	-	-	Lipids and lipid-like molecules	Steroids and steroid derivatives	405.265	0.115884	79.7	-	0.377807	911-40-0	Bile acids, alcohols and derivatives	4.7719	4.6811	4.7732	4.6674	4.771	4.7453	4.4532	4.4359	4.4304	4.4166	4.4434	4.5059	5.6467	5.6617	5.7381
neg_8453	12alpha-hydroxy-3-oxo-5beta-cholan-24-oic Acid	metab_22448	-	-	HMDB0062742;LMST04010168	M-H	C24H38O4	6.2128	-	neg	-	-	-	-	Lipids and lipid-like molecules	Steroids and steroid derivatives	389.27	0.0535927	-	77.5	0.412746	4185-01-07	Bile acids, alcohols and derivatives	4.3255	4.3034	4.2364	4.2568	4.2162	4.3551	3.4385	3.9286	4.0062	4.0671	3.9702	3.9804	5.2786	5.2949	5.3242
neg_8477	Gamma-Ionone	metab_22472	-	-	HMDB0034979	M+FA-H	C13H20O	6.2407	-	neg	-	-	-	-	Lipids and lipid-like molecules	Prenol lipids	237.149	0.0849616	-	69.3	-0.711562	79-76-5	Sesquiterpenoids	3.1792	3.8516	4.2221	4.0856	3.8657	4.0953	5.0307	4.9178	5.0514	4.4459	4.9249	4.9235	4.3712	4.445	4.407
neg_8524	LysoPE(15:0/0:0)	metab_22518	-	-	HMDB0011502	M-H	C20H42NO7P	6.304	-	neg	-	-	-	-	Lipids and lipid-like molecules	Glycerophospholipids	438.263	0.059546	-	53.2	0.34923	-	Glycerophosphoethanolamines	5.1282	5.1726	5.0124	5.0729	5.1109	5.1412	4.4592	4.2678	4.3167	4.3001	4.3408	4.4086	5.5836	5.6153	5.6353
neg_8551	PE(18:1(9Z)/0:0)	metab_22544	-	-	LMGP02050004	M-H	C23H46NO7P	6.3536	-	neg	-	-	-	-	-	-	478.294	0.103447	97.3	-	0.7017	-	-	5.8068	5.7491	5.61	5.725	5.7648	5.7793	5.1613	4.9519	5.051	4.4903	5.1017	4.9987	5.5443	5.6115	5.6325
neg_8736	Myristic Acid	metab_22724	map01100;map00061	Metabolic pathways; Fatty acid biosynthesis	LMFA01010014;HMDB0000806;MJDBOTE0000524	M-H	C14H28O2	6.8685	C06424	neg	Lipids	Fatty acids	Metabolism;Metabolism	Global and overview maps;Lipid metabolism	Lipids and lipid-like molecules	Fatty Acyls	227.201	0.104004	72.4	-	-1.21869	544-63-8	Fatty acids and conjugates	5.7017	5.7159	5.6218	5.6744	5.7737	5.7901	4.4641	4.3955	4.466	4.2623	4.394	4.3492	5.3702	5.4592	5.4057
neg_9780	LysoPE(16:0/0:0)	metab_23760	-	-	HMDB0011503	M-H	C21H44NO7P	6.3536	-	neg	-	-	-	-	Lipids and lipid-like molecules	Glycerophospholipids	452.279	0.0810774	-	57.9	0.673272	53862-35-4	Glycerophosphoethanolamines	6.0696	6.0224	5.9131	5.9558	6.0212	6.0143	5.2908	5.1538	5.2309	4.8784	5.2456	5.2002	6.0412	6.1	6.1068
neg_9853	1-(2,6,6-Trimethyl-2-cyclohexen-1-yl)-1,6-heptadien-3-one	metab_23829	-	-	HMDB0029704	M+FA-H	C16H24O	6.2476	-	neg	-	-	-	-	Lipids and lipid-like molecules	Prenol lipids	277.181	0.0761976	-	71.4	0.135433	79-78-7	Sesquiterpenoids	4.9575	4.9495	4.7117	4.9863	4.9373	4.9696	4.571	4.4676	4.5166	4.3233	4.5009	4.2888	4.7016	4.767	4.7476
neg_10042	Safranal	metab_24017	map00999	Biosynthesis of various secondary metabolites - part 1	HMDB0036061	M+FA-H	C10H14O	6.1072	C17062	neg	-	-	Metabolism	Biosynthesis of other secondary metabolites	Organic oxygen compounds	Organic oxides	195.102	0.118094	-	65.8	-3.8483	116-26-7	Not Available	4.4314	4.4959	4.6726	4.5025	4.559	4.5618	4.8663	4.7577	4.9116	4.7926	4.9112	4.9227	4.6437	4.5428	4.6204
neg_10732	Pisumionoside	metab_24704	-	-	HMDB0039947	M-H2O-H	C19H32O9	5.6703	-	neg	-	-	-	-	Lipids and lipid-like molecules	Prenol lipids	385.189	0.115358	-	69.5	4.30564	371113-06-3	Terpene glycosides	5.1487	5.1742	5.0959	5.0804	5.078	5.0441	4.7455	4.7621	4.7699	4.5483	4.7287	4.6882	4.9304	5.0291	5.0057
neg_10740	(1S,16R)-5,7,11-trihydroxy-8-(hydroxymethyl)-8,10,12,16-tetramethyl-3-[1-(2-methyl-1,3-thiazol-4-yl)prop-1-en-2-yl]-17-oxa-4-azabicyclo[14.1.0]heptadec-4-en-9-one	metab_24712	-	-	HMDB0127530	M+Na-2H	C27H42N2O6S	5.6633	-	neg	-	-	-	-	Organoheterocyclic compounds	Azoles	543.249	0.059584	-	83.9	-3.30133	-	Thiazoles	5.7982	5.784	5.724	5.7241	5.7178	5.7054	5.0191	4.9823	5.0803	4.942	5.0256	5.0763	5.526	5.5529	5.5778
neg_10791	3,4,5-trihydroxy-6-[4-(4-methyl-3-oxopent-1-en-1-yl)phenoxy]oxane-2-carboxylic acid	metab_24763	-	-	HMDB0132950	M-H	C18H22O8	5.6215	-	neg	-	-	-	-	Organic oxygen compounds	Organooxygen compounds	365.121	0.0973429	-	57.4	-7.9729	-	Carbohydrates and carbohydrate conjugates	5.3007	5.3218	5.2309	5.2283	5.2197	5.2171	4.9459	4.9276	4.9904	4.8332	4.9917	4.909	5.0879	5.136	5.1728
neg_10880	(2-methoxy-4-{2-[(1R,16Z,24E,26E,28Z)-1,18,30-trihydroxy-19-methoxy-15,17,21,23,29,35-hexamethyl-2,3,10,14,20-pentaoxo-11,36-dioxa-4-azatricyclo[30.3.1.0?,?]hexatriaconta-16,24,26,28-tetraen-12-yl]propyl}cyclohexyl)oxidanesulfonic acid	metab_24852	-	-	HMDB0127694	M-H2O-H	C50H77NO16S	5.5369	-	neg	-	-	-	-	Phenylpropanoids and polyketides	Macrolide lactams	960.484	0.00971767	-	95.2	5.84451	-	Not Available	6.9813	6.9605	6.9521	6.923	6.8799	6.922	7.2922	7.278	7.312	7.1713	7.1554	7.31	7.1342	7.1262	7.1326
neg_10884	4-oxo-1H-quinoline-2-carboxylic acid	metab_24856	-	-	;MJDBWX000002312	M-H	C10H7NO3	5.5369	-	neg	-	-	-	-	-	-	188.035	0.0164145	77.7	-	-3.43619	-	-	4.1586	4.2203	4.2727	4.1146	4.1735	4.1711	4.6746	4.7177	4.594	4.7249	4.7423	4.7355	4.4981	4.5096	4.4967
neg_10913	(2Z)-2-(hydroxymethyl)-3-phenylprop-2-enal	metab_24885	-	-	HMDB0133595	M-H	C10H10O2	5.5019	-	neg	-	-	-	-	Phenylpropanoids and polyketides	Cinnamaldehydes	161.06	0.0879053	-	56.3	-4.74666	-	Not Available	4.4483	4.4684	4.4922	4.3944	4.4173	4.4046	4.2108	4.1048	4.141	4.1298	4.1811	4.085	4.3412	4.3825	4.3064
neg_10938	Austinol	metab_24909	-	-	HMDB0034464	M+Na-2H	C25H30O8	5.4786	-	neg	-	-	-	-	Organoheterocyclic compounds	Furopyrans	479.168	0.281047	-	65.8	-2.44244	72040-27-8	Not Available	5.2942	5.3256	5.1866	5.1221	5.0988	5.1844	4.3727	4.1561	4.3927	4.0127	4.3613	4.1954	4.9444	4.9176	5.1293
neg_10968	Piperundecalidine	metab_24939	-	-	HMDB0030240	M+FA-H	C23H29NO3	5.4576	-	neg	-	-	-	-	Organoheterocyclic compounds	Benzodioxoles	412.209	0.0501077	-	57.3	-9.7965	88660-11-1	Not Available	4.7874	4.7646	4.7875	4.7589	4.7662	4.7186	4.5005	4.4762	4.4276	4.315	4.529	4.325	4.6396	4.6021	4.6411
neg_11060	3,17-Androstanediol glucuronide	metab_25031	-	-	LMST05010037;HMDB0010321;HMDB0010339	2M+FA-H	C25H40O8	5.3586	-	neg	-	-	-	-	Benzenoids	Benzene and substituted derivatives	981.544	0.012397	-	75.3	0.884007	-	Benzophenones	5.7108	5.7005	5.6567	5.6918	5.6294	5.5934	7.0693	7.0975	7.1366	7.0276	7.1136	7.1074	6.7892	6.7868	6.7789
neg_11201	Janthitrem C	metab_25172	-	-	HMDB0040684	M+K-2H	C37H47NO4	5.2111	C20601	neg	-	-	-	-	Organoheterocyclic compounds	Naphthopyrans	606.303	0.0852525	-	62.4	6.01274	73561-91-8	Not Available	5.194	5.2016	5.2206	5.2345	5.2048	5.3466	5.4445	5.546	5.4445	5.3373	5.4028	5.533	5.3489	5.3383	5.2785
neg_11207	Methionyl-Threonine	metab_25178	-	-	HMDB0028983	2M-H	C9H18N2O4S	5.2041	-	neg	-	-	-	-	Organic acids and derivatives	Carboxylic acids and derivatives	499.188	0.0523712	-	67.2	-5.09508	-	Amino acids, peptides, and analogues	5.7765	5.7746	5.7656	5.7433	5.7468	5.7469	5.4305	5.3706	5.4528	5.3556	5.4432	5.3955	5.6646	5.6205	5.6343
neg_11275	S-(PGJ2)-glutathione	metab_25246	-	-	HMDB0013063	M+Na-2H	C30H47N3O10S	5.1474	-	neg	-	-	-	-	Organic acids and derivatives	Carboxylic acids and derivatives	662.269	0.0555574	-	84.5	-6.55747	-	Amino acids, peptides, and analogues	5.3855	5.3091	5.2871	5.25	5.2405	5.2846	5.0844	5.0179	5.1462	4.7265	5.1085	5.0352	5.2027	5.2223	5.2505
neg_11328	Desacetylvinblastine	metab_25299	-	-	HMDB0061054	M+Cl	C44H56N4O8	5.0914	-	neg	-	-	-	-	Organoheterocyclic compounds	Azoles	803.377	0.0318189	-	64.5	-2.38626	-	Triazoles	5.9619	5.939	5.9097	5.938	5.9619	5.8715	5.7328	5.7208	5.6984	5.6319	5.6026	5.7094	5.8264	5.8153	5.7989
neg_11393	Lettucenin A	metab_25364	-	-	HMDB0036738	M+Cl	C15H12O3	5.0215	-	neg	-	-	-	-	Organoheterocyclic compounds	Cycloheptafurans	275.05	0.0995893	-	70.2	7.24078	97915-46-3	Not Available	4.643	4.5229	4.5631	4.5206	4.6407	4.5167	2.9307	3.3588	3.4021	2.917	3.511	2.9513	4.2842	4.2826	4.3564
neg_12065	Ginsenoside La	metab_26036	-	-	HMDB0039647	M+Cl	C42H70O13	4.4056	-	neg	-	-	-	-	Lipids and lipid-like molecules	Prenol lipids	817.45	0.0612419	-	56.7	-1.38256	123617-34-5	Triterpenoids	6.1282	6.1337	6.1484	6.1304	6.1266	6.1004	5.9218	5.9182	5.8916	5.7945	5.9307	5.8591	6.0366	6.0367	5.9897
neg_12089	6-Hydroxymelatonin	metab_26060	map00380	Tryptophan metabolism	HMDB0004081	2M-H	C13H16N2O3	4.3917	C05643	neg	-	-	Metabolism	Amino acid metabolism	Organoheterocyclic compounds	Indoles and derivatives	495.229	0.0704979	-	72.5	8.3289	2208-41-5	Hydroxyindoles	5.6014	5.6308	5.6133	5.5916	5.5968	5.5873	6.0175	6.0315	5.9862	5.9579	6.0387	5.9675	5.8681	5.8068	5.8401
neg_12120	N-Deschlorobenzoyl indomethacin	metab_26091	-	-	HMDB0013988	M+FA-H	C12H13NO3	4.3706	-	neg	-	-	-	-	Organoheterocyclic compounds	Indoles and derivatives	264.088	0.138747	-	57.7	0.916127	-	Indolyl carboxylic acids and derivatives	5.7088	5.6928	5.6168	5.601	5.5859	5.5264	5.063	5.1353	5.1038	4.8638	5.0783	5.0095	5.4943	5.397	5.5144
neg_12189	Fumonisin A1	metab_26160	-	-	LMSP01080026;HMDB0034713	M-H2O-H	C36H61NO16	4.321	-	neg	-	-	-	-	Organic acids and derivatives	Carboxylic acids and derivatives	744.38	0.0881821	-	60.5	-1.16288	117415-48-2	Fumonisins	6.6309	6.6114	6.5929	6.5689	6.5722	6.5401	6.2584	6.2445	6.1559	6.1001	6.2827	6.2581	6.4796	6.4204	6.4946
neg_12221	S-(9-hydroxy-PGA1)-glutathione	metab_26192	-	-	HMDB0013059	M-H2O-H	C30H51N3O10S	4.3069	-	neg	-	-	-	-	Organic acids and derivatives	Carboxylic acids and derivatives	626.316	0.0489468	-	88.9	7.10276	-	Amino acids, peptides, and analogues	6.044	5.9971	6.0314	5.9788	6.0058	6.0033	5.2721	5.2509	5.2201	5.2222	5.2907	5.2552	5.7896	5.7933	5.8277
neg_12478	Rebaudioside B	metab_26449	-	-	LMPR01040125;HMDB0034949	M-H2O-H	C38H60O18	4.0838	-	neg	-	-	-	-	Lipids and lipid-like molecules	Prenol lipids	785.368	0.0999649	-	54.7	9.64649	58543-17-2	Terpene glycosides	6.0469	6.1182	6.0472	6.0714	6.0735	6.0351	5.5877	5.5502	5.5456	5.5172	5.5508	5.6194	5.9506	5.8733	5.9513
neg_12589	3-O-Protocatechuoylceanothic acid	metab_26560	-	-	HMDB0029625	M+Cl	C37H50O8	4.0071	-	neg	-	-	-	-	Lipids and lipid-like molecules	Prenol lipids	657.326	0.0727418	-	68.2	9.47918	-	Triterpenoids	6.0724	6.0741	6.0783	5.993	6.0935	6.0504	5.7357	5.7352	5.7385	5.6637	5.743	5.7744	5.9648	5.9255	5.9029
neg_12598	Dynorphin B (6-9)	metab_26569	-	-	HMDB0012937	M+K-2H	C26H43N11O6	4.0001	-	neg	-	-	-	-	Organic acids and derivatives	Carboxylic acids and derivatives	642.29	0.0727488	-	75.8	2.31076	-	Amino acids, peptides, and analogues	6.4531	6.4652	6.4558	6.3703	6.4511	6.3914	6.0676	6.1046	6.1021	6.0643	6.1187	6.1199	6.3275	6.3475	6.2848
neg_12710	L-glycyl-L-hydroxyproline	metab_26680	-	-	-	2M+FA-H	C7H12N2O4	3.9027	-	neg	-	-	-	-	-	-	421.156	0.091857	-	52.4	-5.21091	-	-	5.128	5.1295	5.2198	5.1664	5.194	5.1949	4.812	4.8162	4.795	4.8877	4.7382	4.9198	5.0743	4.9951	5.0294
neg_12753	Chenodeoxycholic acid sulfate	metab_26723	-	-	LMST05020026;HMDB0002522	M-H2O-H	C24H40O7S	3.8677	-	neg	-	-	-	-	Lipids and lipid-like molecules	Steroids and steroid derivatives	453.236	0.0833896	-	65.6	8.33824	59132-31-9	Bile acids, alcohols and derivatives	4.884	4.8099	4.6179	4.6417	4.8584	4.7811	5.9048	5.8922	5.9445	5.7956	5.9	5.902	5.634	5.6123	5.6821
neg_12830	Hydroxy-lacosamide	metab_26800	-	-	HMDB0061146	M-H2O-H	C13H18N2O5	3.8116	-	neg	-	-	-	-	Organic acids and derivatives	Carboxylic acids and derivatives	263.104	0.017851	-	62.2	0.421765	-	Amino acids, peptides, and analogues	5.1029	5.1235	5.0988	5.0988	5.0802	5.0876	4.8744	4.7932	4.8939	4.8896	4.885	4.9058	5.0145	5	5.0027
neg_12982	Pyridinoline	metab_26952	-	-	HMDB0000851	2M-H	C18H28N4O8	3.6927	-	neg	-	-	-	-	Organic acids and derivatives	Carboxylic acids and derivatives	855.376	0.0350602	-	84.8	2.36752	63800-01-1	Amino acids, peptides, and analogues	6.758	6.7796	6.7582	6.7686	6.7712	6.7534	6.2045	6.2075	6.2127	6.1623	6.288	6.2702	6.6099	6.588	6.6176
neg_13138	Hordatine A	metab_27108	-	-	HMDB0030461	M+Na-2H	C28H38N8O5	3.5941	C08307	neg	-	-	-	-	Phenylpropanoids and polyketides	2-arylbenzofuran flavonoids	587.269	0.036333	-	73.5	-3.14913	7073-64-5	Not Available	5.7882	5.8096	5.754	5.7306	5.7612	5.7458	5.5336	5.5535	5.6328	5.4257	5.5315	5.5517	5.6977	5.6699	5.6974
neg_13210	Piperolein B	metab_27180	-	-	HMDB0030340	M+Na-2H	C21H29NO3	3.5591	-	neg	-	-	-	-	Organoheterocyclic compounds	Benzodioxoles	364.188	0.0168165	-	56.3	-3.68499	30505-89-6	Not Available	4.9394	5.0733	5.1087	5.0945	5.131	5.0923	5.5762	5.6426	5.5756	5.6846	5.5723	5.6466	5.4011	5.3875	5.3899
neg_13218	LysoPA(P-16:0e/0:0)	metab_27188	-	-	-	M+Na-2H	C19H39O6P	3.552	-	neg	-	-	-	-	-	-	415.22	0.144912	-	64.6	-7.89704	-	-	4.7163	4.7979	4.8184	4.8414	4.9009	4.8046	5.0416	5.0602	4.9812	4.9385	5.0945	5.0374	4.9544	4.8282	4.9182
neg_13252	Sanshodiol	metab_27222	-	-	HMDB0030573	2M-H	C20H22O6	3.5172	-	neg	-	-	-	-	Lignans, neolignans and related compounds	Furanoid lignans	715.281	0.0528121	-	50.9	6.49841	54854-91-0	Tetrahydrofuran lignans	6.9434	6.8545	6.924	6.8988	6.9241	6.8927	6.7216	6.6993	6.6852	6.6575	6.7206	6.6977	6.8375	6.8288	6.8716
neg_13551	Isoachifolidiene	metab_27521	-	-	HMDB0038690	M+FA-H	C20H24O5	3.3424	-	neg	-	-	-	-	Lipids and lipid-like molecules	Fatty Acyls	389.157	0.0346356	-	58	-9.12879	-	Fatty acid esters	5.4265	5.2357	5.3635	5.0979	5.1655	5.176	4.0942	4.4117	4.3779	4.1192	3.7558	3.7599	5.036	5.0093	5.0353
neg_13558	N-[2-(3,4-dimethoxyphenyl)ethyl]-3-(3-hydroxy-4-methoxyphenyl)propanimidic acid	metab_27528	-	-	HMDB0135480	2M-H	C20H25NO5	3.3354	-	neg	-	-	-	-	Benzenoids	Phenols	717.333	0.00527017	-	69.7	-8.44823	-	Methoxyphenols	5.9534	5.936	5.9284	5.8658	5.9047	5.8991	6.4084	6.3818	6.4051	6.2993	6.3602	6.426	6.1847	6.1823	6.1801
neg_13737	13-Demethyl tacrolimus	metab_27707	map00983	Drug metabolism - other enzymes	HMDB0060706	M+Na-2H	C43H67NO12	3.2305	C07649	neg	-	-	Metabolism	Xenobiotics biodegradation and metabolism	Organoheterocyclic compounds	Diazines	810.438	0.00960081	-	95.5	-3.68623	-	Pyrimidines and pyrimidine derivatives	6.8462	6.8463	6.8527	6.8333	6.843	6.8357	7.1741	7.1732	7.1802	7.1417	7.2186	7.2012	7.032	7.0335	7.0257
neg_13817	6-Epi-7-isocucurbic acid glucoside	metab_27787	-	-	HMDB0029782	M+FA-H	C18H30O8	3.1955	-	neg	-	-	-	-	Lipids and lipid-like molecules	Fatty Acyls	419.194	0.0300991	-	59.2	4.39404	176486-13-8	Fatty acyl glycosides	4.9446	4.9681	4.9318	4.9094	4.9095	5.0074	5.7874	5.8028	5.7574	5.8918	5.8749	5.8304	5.5339	5.5077	5.5221
neg_13820	DIPROTIN B	metab_27790	-	-	-	M-H	C16H29N3O4	3.1955	-	neg	-	-	-	-	-	-	326.209	0.0225869	80.7	-	0.239255	-	-	5.1889	5.1563	5.2102	5.2396	5.1604	5.2763	6.3529	6.3534	6.3692	6.452	6.4514	6.3723	6.0352	6.0485	6.0544
neg_13921	Cis-3-Hexenyl b-primeveroside	metab_27890	-	-	HMDB0031690	M+FA-H	C17H30O10	3.1187	-	neg	-	-	-	-	Lipids and lipid-like molecules	Fatty Acyls	439.184	0.0910319	-	52.4	4.31647	132278-37-6	Fatty acyl glycosides	5.2372	5.2819	5.3028	5.2615	5.2846	5.2257	4.7103	4.8626	4.8171	4.6527	4.7349	4.874	5.1372	5.1389	5.0676
neg_13924	Jubanine A	metab_27893	-	-	HMDB0030205	M+Na-2H	C40H49N5O6	3.1117	-	neg	-	-	-	-	Organic acids and derivatives	Carboxylic acids and derivatives	716.349	0.0450201	-	83.4	8.19446	60375-07-7	Amino acids, peptides, and analogues	6.4503	6.4145	6.4423	6.4119	6.4304	6.4413	6.7484	6.7001	6.7407	6.6723	6.6141	6.747	6.5701	6.5925	6.5537
neg_13927	Cafamarine	metab_27896	-	-	HMDB0037003	M+Na-2H	C26H36O10	3.1117	-	neg	-	-	-	-	Organoheterocyclic compounds	Naphthofurans	529.206	0.0107105	-	53.3	0.693349	42612-19-1	Not Available	5.1142	5.0941	5.1775	5.0092	5.0489	5.1239	5.4214	5.4276	5.3192	5.4709	5.4349	5.4343	5.2905	5.2869	5.2813
neg_13937	Rivenprost	metab_27906	-	-	-	M-H	C24H34O6S	3.1047	-	neg	-	-	-	-	-	-	449.205	0.019564	60	-	9.29521	-	-	5.8612	5.8582	5.9274	5.8598	5.8855	5.8649	6.3365	6.3054	6.3353	6.3164	6.3292	6.3406	6.154	6.1563	6.1405
neg_13947	Canescein	metab_27916	-	-	HMDB0029313	M+FA-H	C29H42O11	3.0978	-	neg	-	-	-	-	Organoheterocyclic compounds	Isobenzofurans	611.269	0.0363576	-	75.4	-3.91046	22333-73-9	Not Available	7.5366	7.5171	7.5264	7.4835	7.5368	7.502	7.1995	7.1689	7.1937	7.1084	7.2001	7.1995	7.3939	7.421	7.394
neg_14031	Olitorin	metab_28000	-	-	HMDB0034361	M+K-2H	C35H52O14	3.0419	-	neg	-	-	-	-	Lipids and lipid-like molecules	Steroids and steroid derivatives	733.291	0.0278526	-	79.1	9.50071	13289-20-8	Steroid lactones	7.2055	7.1904	7.1774	7.1835	7.2133	7.1657	6.5499	6.5066	6.5091	6.411	6.4342	6.4833	6.9835	6.9991	6.9754
neg_14038	Glutaminylphenylalanine	metab_28007	-	-	HMDB0028804	M-H2O-H	C14H19N3O4	3.0419	-	neg	-	-	-	-	Organic acids and derivatives	Carboxylic acids and derivatives	274.12	0.0572133	-	81.9	0.577406	92327-75-8	Amino acids, peptides, and analogues	5.8434	5.8618	5.8745	5.8583	5.8861	5.8957	5.2623	5.2249	5.2195	5.3748	5.2543	5.1915	5.6524	5.7018	5.6742
neg_14095	Mucronine D	metab_28064	-	-	HMDB0029335	M+K-2H	C37H51N5O6	2.9998	C10009	neg	-	-	-	-	Organic acids and derivatives	Carboxylic acids and derivatives	698.338	0.0461749	-	75.8	7.56819	38496-00-3	Amino acids, peptides, and analogues	6.1584	6.1656	6.1752	6.1911	6.1892	6.1755	5.583	5.6368	5.5319	5.4901	5.5849	5.5388	5.9874	6.0236	5.9915
neg_14319	3-Methyldioxyindole	metab_28287	map00380	Tryptophan metabolism	HMDB0004186	M-H	C9H9NO2	2.8602	C05834	neg	-	-	Metabolism	Amino acid metabolism	Organoheterocyclic compounds	Indoles and derivatives	162.055	0.0256257	-	71.4	-5.08386	3040-34-4	Indolines	4.8137	4.8475	4.8983	4.9376	4.882	4.8767	5.1543	5.1223	5.136	5.0144	5.0933	5.0873	5.014	5.0165	5.0343
neg_14350	Lysyl-Hydroxyproline	metab_28318	-	-	HMDB0028952	M-H2O-H	C11H21N3O4	2.8393	-	neg	-	-	-	-	Organic acids and derivatives	Carboxylic acids and derivatives	240.135	0.0255328	-	67.6	-0.469343	-	Amino acids, peptides, and analogues	5.729	5.7538	5.7813	5.7482	5.7618	5.7663	5.1425	5.1696	5.1772	5.2496	5.188	5.2172	5.5974	5.5759	5.5821
neg_14455	2-Hydroxy-imipramine glucuronide	metab_28423	-	-	HMDB0060717	M+FA-H	C25H32N2O7	2.7835	-	neg	-	-	-	-	Lipids and lipid-like molecules	Steroids and steroid derivatives	517.216	0.10551	-	74.3	-7.64625	-	Estrane steroids	5.707	5.561	5.6617	5.3802	5.4927	5.5163	4.9974	5.0379	4.9813	4.9673	5.0087	5.0385	5.485	5.4065	5.409
neg_14535	Austalide G	metab_28503	-	-	HMDB0030154	M+FA-H	C28H38O9	2.7343	-	neg	-	-	-	-	Organoheterocyclic compounds	Benzopyrans	563.247	0.0578444	-	54.8	-4.98346	96817-09-3	1-benzopyrans	5.8289	5.8178	5.8459	5.8807	5.8595	5.8697	6.1174	6.0893	6.046	6.0696	6.0876	6.0129	5.9572	5.9629	5.9161
neg_14742	Hovenidulcioside B2	metab_28710	-	-	HMDB0041549	M+Na-2H	C38H60O12	2.6226	-	neg	-	-	-	-	Lipids and lipid-like molecules	Prenol lipids	729.38	0.0443344	-	51.7	-4.99266	174902-17-1	Terpene glycosides	6.2363	6.2174	6.2322	6.206	6.2236	6.2436	6.5539	6.5324	6.5117	6.5386	6.5456	6.5564	6.4067	6.4198	6.3816
neg_14763	Nomilinic acid 17-glucoside	metab_28731	-	-	HMDB0037892	M-H2O-H	C34H48O16	2.6088	-	neg	-	-	-	-	Lipids and lipid-like molecules	Saccharolipids	693.278	0.0744319	-	83.1	2.34751	113301-65-8	Not Available	6.5436	6.5124	6.5083	6.4994	6.5151	6.504	6.2677	6.2321	6.2341	6.1487	6.1992	6.2448	6.3888	6.4317	6.3692
neg_14845	Glutaminylvaline	metab_28813	-	-	HMDB0028810	M-H2O-H	C10H19N3O4	2.5668	-	neg	-	-	-	-	Organic acids and derivatives	Carboxylic acids and derivatives	226.12	0.00592293	-	70.2	-0.798767	31189-73-8	Amino acids, peptides, and analogues	5.8771	5.918	5.9097	5.8948	5.9222	5.9241	5.4659	5.5197	5.4932	5.529	5.5129	5.5182	5.7701	5.7721	5.767
neg_14896	BOX B	metab_28864	-	-	HMDB0004145	M+FA-H	C9H10N2O2	2.5528	-	neg	-	-	-	-	Organoheterocyclic compounds	Pyrrolines	223.072	0.0354427	-	77.2	-1.52986	329314-75-2	Not Available	5.4615	5.4691	5.4785	5.4287	5.4414	5.4503	5.1342	5.183	5.2265	5.172	5.1981	5.2525	5.3612	5.3793	5.3919
neg_14918	19-Hydroxydeacetylnomilinic acid 17-beta-D-glucopyranoside	metab_28886	-	-	HMDB0037589	M-H	C32H46O16	2.5388	-	neg	-	-	-	-	Lipids and lipid-like molecules	Saccharolipids	685.27	0.1041	-	73.5	-1.9159	-	Not Available	5.8291	5.7608	5.7653	5.7293	5.816	5.6975	5.5538	5.474	5.5512	5.336	5.4212	5.5429	5.7461	5.6632	5.6783
neg_14943	Glycyl-Phenylalanine	metab_28911	-	-	HMDB0028848	M-H	C11H14N2O3	2.5248	-	neg	-	-	-	-	Organic acids and derivatives	Carboxylic acids and derivatives	221.093	0.0544877	-	81.8	-1.31809	-	Amino acids, peptides, and analogues	4.7327	4.6854	4.7336	4.7519	4.7006	4.742	5.0535	5.0347	5.0604	5.0392	5.0434	5.0443	4.8859	4.9115	4.8643
neg_15147	2-Phenylaminoadenosine	metab_29115	-	-	HMDB0001069	M+FA-H	C16H18N6O4	2.4058	-	neg	-	-	-	-	Nucleosides, nucleotides, and analogues	Purine nucleosides	403.136	0.102888	-	67	-3.04555	53296-10-9	Not Available	5.7472	5.6375	5.8442	5.3706	5.5514	5.5586	3.9631	4.223	4.3562	4.4618	4.3309	4.5633	5.4278	5.4665	5.5165
neg_15233	Nigellicine	metab_29201	-	-	HMDB0030269	M+FA-H	C13H14N2O3	2.3638	-	neg	-	-	-	-	Organoheterocyclic compounds	Benzopyrazoles	291.099	0.0275897	-	69.4	0.874836	98063-20-8	Indazoles	6.7705	6.7409	6.7128	6.7483	6.7527	6.7469	6.375	6.3515	6.3841	6.2889	6.3345	6.3698	6.5989	6.6226	6.6083
neg_15295	Gibberellin A43	metab_29263	-	-	HMDB0035046	M-H2O-H	C20H26O8	2.3289	-	neg	-	-	-	-	Lipids and lipid-like molecules	Prenol lipids	375.141	0.0591438	-	69.4	-8.94884	54605-43-5	Diterpenoids	5.3872	5.3653	5.3305	5.2978	5.3255	5.2561	4.9775	5.1083	5.1014	4.9802	5.0993	5.1131	5.2694	5.2206	5.261
neg_15328	5-Formiminotetrahydrofolic acid	metab_29296	map01100;map00670	Metabolic pathways; One carbon pool by folate	HMDB0001534	M-H	C20H24N8O6	2.3149	C00664	neg	-	-	Metabolism;Metabolism	Global and overview maps;Metabolism of cofactors and vitamins	Organoheterocyclic compounds	Pteridines and derivatives	471.174	0.0571861	-	68.5	-1.23571	2311-81-1	Pterins and derivatives	5.8847	5.8972	5.8443	5.8074	5.8784	5.8354	5.5114	5.4925	5.6164	5.4464	5.5344	5.5876	5.7432	5.7884	5.7494
neg_15423	Tetrahydrofolic acid	metab_29391	map01100;map00720;map00970;map01120;map01200;map00260;map00680;map00790;map00670	Metabolic pathways; Carbon fixation pathways in prokaryotes; Aminoacyl-tRNA biosynthesis; Microbial metabolism in diverse environments; Carbon metabolism; Glycine, serine and threonine metabolism; Methane metabolism; Folate biosynthesis; One carbon pool by folate	HMDB0001846	M+FA-H	C19H23N7O6	2.2661	C00101	neg	Vitamins and Cofactors	Cofactors	Metabolism;Metabolism;Genetic Information Processing;Metabolism;Metabolism;Metabolism;Metabolism;Metabolism;Metabolism	Global and overview maps;Energy metabolism;Translation;Global and overview maps;Global and overview maps;Amino acid metabolism;Energy metabolism;Metabolism of cofactors and vitamins;Metabolism of cofactors and vitamins	Organoheterocyclic compounds	Imidazopyrimidines	490.169	0.0434049	-	67.3	-1.31713	135-16-0	Purines and purine derivatives	5.9524	5.8276	5.983	5.6934	5.7841	5.7825	5.2513	5.2535	5.2756	5.2997	5.2167	5.2849	5.6962	5.6713	5.6596
neg_15430	Deoxynivalenol	metab_29398	-	-	HMDB0036156	2M+FA-H	C15H20O6	2.2591	C09747	neg	-	-	-	-	Lipids and lipid-like molecules	Prenol lipids	637.248	0.0336708	-	65	-3.22161	51481-10-8	Sesquiterpenoids	5.8263	5.8758	5.8551	5.8743	5.8602	5.882	5.7072	5.7141	5.5875	5.6408	5.6726	5.6198	5.7684	5.7904	5.7631
neg_15509	11-[(2R)-3-[2-amino-3-methyl-4-(2-methyl-1,3-thiazol-4-yl)but-3-en-1-yl]-2-methyloxiran-2-yl]-3-hydroxy-4,4,6,8-tetramethyl-5-oxo-7-(sulfooxy)undecanoic acid	metab_29477	-	-	HMDB0127547	M+Na-2H	C27H44N2O9S2	2.2106	-	neg	-	-	-	-	Lipids and lipid-like molecules	Prenol lipids	625.225	0.0435293	-	78.3	1.92241	-	Diterpenoids	6.7519	6.7451	6.754	6.7257	6.7635	6.7199	6.5254	6.5345	6.5676	6.5269	6.5395	6.5799	6.6813	6.7092	6.6736
neg_15815	20-Oxo-leukotriene E4	metab_29783	-	-	HMDB0012642;LMFA03020065	M+K-2H	C23H35NO6S	2.0782	-	neg	-	-	-	-	Lipids and lipid-like molecules	Fatty Acyls	490.169	0.00963437	-	61.9	3.53773	-	Fatty acyl thioesters	6.1351	5.9486	6.1173	5.8242	5.9353	5.968	5.5025	5.595	5.5652	5.628	5.6191	5.6248	5.8769	5.8821	5.8852
neg_15908	2-amino-4-({1-[(carboxymethyl)-C-hydroxycarbonimidoyl]-2-{[2-hydroxy-3-(4-methoxyphenyl)-3-oxo-1-phenylpropyl]sulfanyl}ethyl}-C-hydroxycarbonimidoyl)butanoic acid	metab_29876	-	-	HMDB0135628	M-H2O-H	C26H31N3O9S	2.0502	-	neg	-	-	-	-	Organic acids and derivatives	Carboxylic acids and derivatives	542.163	0.116283	-	60.5	5.05552	-	Amino acids, peptides, and analogues	5.7194	5.7088	5.6483	5.504	5.4561	5.3496	5.2557	5.3091	5.3959	5.5762	4.9384	5.0786	5.5924	5.5482	5.4908
neg_15977	7-Hydroxy-6-methyl-8-ribityl lumazine	metab_29945	map00740	Riboflavin metabolism	HMDB0004256	M-H	C12H16N4O7	2.0076	C05995	neg	-	-	Metabolism	Metabolism of cofactors and vitamins	Organoheterocyclic compounds	Pteridines and derivatives	327.095	0.0889733	-	77.4	0.849475	-	Not Available	5.9185	5.8886	5.8217	5.8516	5.8823	5.8333	5.6637	5.5856	5.6913	5.4102	5.6605	5.6523	5.8283	5.7522	5.7824
neg_16031	Deoxyuridine	metab_29999	map00240;map01100;map02010	Pyrimidine metabolism; Metabolic pathways; ABC transporters	HMDB0000012	2M+FA-H	C9H12N2O5	1.9727	C00526	neg	Nucleic acids	Nucleosides	Metabolism;Metabolism;Environmental Information Processing	Nucleotide metabolism;Global and overview maps;Membrane transport	Nucleosides, nucleotides, and analogues	Pyrimidine nucleosides	501.148	0.0845223	-	70.5	2.09615	951-78-0	Pyrimidine 2'-deoxyribonucleosides	5.825	5.7285	5.39	5.7892	5.767	5.7578	5.5028	5.4919	5.4643	4.7058	5.4749	5.4643	5.678	5.6081	5.6672
neg_16197	Ramiprilat	metab_30165	-	-	HMDB0060579	M-H	C21H28N2O5	1.9311	-	neg	-	-	-	-	Organic acids and derivatives	Carboxylic acids and derivatives	387.189	0.0757947	-	52.9	-9.29024	-	Amino acids, peptides, and analogues	5.5084	5.4662	5.4743	5.5063	5.5181	5.4713	6.0083	5.9899	6.0246	6.0034	6.0264	6.0223	5.7899	5.755	5.821
neg_16239	Cascarillin	metab_30207	-	-	HMDB0036836	M+FA-H	C22H32O7	1.9096	C09071	neg	-	-	-	-	Lipids and lipid-like molecules	Prenol lipids	453.211	0.0436397	-	64.2	-5.38973	10118-56-6	Diterpenoids	5.8979	5.8982	5.8859	5.8667	5.8828	5.8823	6.2057	6.1949	6.2149	6.1111	6.167	6.2184	6.0835	6.0464	6.0595
neg_16336	Asparaginyl-Proline	metab_30304	-	-	HMDB0028739	M-H2O-H	C9H15N3O4	1.8608	-	neg	-	-	-	-	Organic acids and derivatives	Carboxylic acids and derivatives	210.088	0.0480902	-	74.6	-1.66687	-	Amino acids, peptides, and analogues	6.1272	6.1448	6.1231	6.1576	6.1551	6.1431	5.9378	5.9272	5.9324	5.9184	5.9435	5.934	6.0633	6.033	6.0737
neg_16448	Harderoporphyrin	metab_30416	-	-	HMDB0000683	M+Na-2H	C35H36N4O6	1.7975	-	neg	-	-	-	-	Organoheterocyclic compounds	Tetrapyrroles and derivatives	629.237	0.159015	-	62.3	-1.59409	30783-27-8	Porphyrins	5.851	5.8598	5.8477	5.8102	5.8694	5.8018	6.103	6.08	6.1212	6.0092	6.0575	6.0968	6.0744	5.9445	5.9796
neg_16455	Arabinosylhypoxanthine	metab_30423	-	-	HMDB0003040	M+FA-H	C10H12N4O5	1.7975	-	neg	-	-	-	-	Nucleosides, nucleotides, and analogues	Purine nucleosides	313.079	0.258874	-	63.2	1.77735	7013-16-3	Not Available	4.8969	4.9608	4.9985	4.7919	4.9501	4.8535	4.2867	4.226	4.3253	4.3572	4.3248	4.3429	4.7796	4.6643	4.5535
neg_16458	8-Hydroxy-7-methylguanine	metab_30426	-	-	HMDB0006037	M-H2O-H	C6H7N5O2	1.7975	-	neg	-	-	-	-	Organoheterocyclic compounds	Imidazopyrimidines	162.041	0.0466357	-	58.8	-4.19779	1688-85-3	Purines and purine derivatives	5.302	5.3069	5.3023	5.3164	5.3144	5.3004	4.8604	4.8412	4.8685	4.7678	4.8567	4.8651	5.1717	5.1312	5.1546
neg_16484	Glucosylgalactosyl hydroxylysine	metab_30452	-	-	HMDB0000585	M+FA-H	C18H34N2O13	1.7766	-	neg	-	-	-	-	Lipids and lipid-like molecules	Fatty Acyls	531.207	0.089152	-	85.1	4.8431	32448-35-4	Fatty acyl glycosides	6.0197	6.0256	6.0067	5.9546	6.0029	5.9394	5.65	5.6536	5.7311	5.7617	5.6753	5.7343	5.9436	5.8659	5.9132
neg_16566	Guanidylic acid (guanosine monophosphate)	metab_30534	-	-	-	M-H	C10H14N5O8P	1.741	-	neg	-	-	-	-	-	-	362.051	0.0358728	71.7	-	1.33866	-	-	5.8262	5.8284	5.8159	5.801	5.7883	5.7985	3.5378	3.8429	3.9277	4.1101	3.5486	3.5584	5.5682	5.5399	5.5432
neg_16655	Glutamylmethionine	metab_30623	-	-	HMDB0028825	M-H	C10H18N2O5S	1.6783	-	neg	-	-	-	-	Organic acids and derivatives	Carboxylic acids and derivatives	277.086	0.107827	-	60.8	0.34669	4423-22-7	Amino acids, peptides, and analogues	5.0361	5.0087	5.0668	4.9798	4.9857	4.9337	5.3436	5.305	5.4409	5.5081	5.3927	5.4314	5.3401	5.2461	5.2955
neg_16662	Adenosine 3'-monophosphate	metab_30630	map01100;map00230	Metabolic pathways; Purine metabolism	HMDB0003540	M-H	C10H14N5O7P	1.6715	C01367	neg	-	-	Metabolism;Metabolism	Global and overview maps;Nucleotide metabolism	Nucleosides, nucleotides, and analogues	Ribonucleoside 3'-phosphates	346.056	0.132503	92.9	-	0.779981	-	Not Available	5.9193	5.8766	5.8223	5.8457	5.8365	5.814	3.563	3.6034	3.6858	3.5493	3.5738	3.5836	5.6174	5.5038	5.5513
neg_16780	Serylvaline	metab_30748	-	-	HMDB0029052	M-H	C8H16N2O4	1.4757	-	neg	-	-	-	-	Organic acids and derivatives	Carboxylic acids and derivatives	203.103	0.079349	-	60.4	-1.9384	51782-06-0	Amino acids, peptides, and analogues	4.9264	5.0243	4.9969	4.8696	4.8894	4.835	5.0121	5.0363	5.1944	5.3488	5.2908	5.1784	5.2024	5.1339	5.164
neg_16820	2-(4-hydroxy-3-methoxyphenyl)-3,4-dihydro-2H-1-benzopyran-3,7-diol	metab_30788	-	-	HMDB0135092	2M+FA-H	C16H16O5	1.3998	-	neg	-	-	-	-	Phenylpropanoids and polyketides	Flavonoids	621.202	0.222664	-	66.2	6.78323	-	O-methylated flavonoids	6.6814	6.7006	6.6615	6.5715	6.5768	6.5095	6.3382	6.3355	6.4585	6.4372	6.3818	6.4584	6.6865	6.4971	6.5731
neg_16945	Melleolide K	metab_30912	-	-	HMDB0035001	M+FA-H	C23H27ClO6	1.2335	-	neg	-	-	-	-	Lipids and lipid-like molecules	Prenol lipids	479.146	0.106082	-	57.2	-4.66972	-	Sesquiterpenoids	6.1624	6.1828	6.1374	6.0973	6.08	6.0255	5.8697	5.8242	5.9441	5.9086	5.9073	5.9711	6.1306	6.0379	6.0905
neg_17001	Niazicinin A	metab_30968	-	-	HMDB0031947	M+Na-2H	C17H23NO8	1.1773	-	neg	-	-	-	-	Organic oxygen compounds	Organooxygen compounds	390.116	0.288805	-	55	-3.00387	-	Carbohydrates and carbohydrate conjugates	5.6503	5.6103	5.3325	5.5714	5.5475	5.4944	5.21	5.2233	5.3291	4.8206	5.296	5.3234	5.5614	5.314	5.4193
neg_17039	N-acetylaspartate	metab_31006	map01100;map00250	Metabolic pathways; Alanine, aspartate and glutamate metabolism	HMDB0000812	M-H	C6H9NO5	1.1363	C01042	neg	-	-	Metabolism;Metabolism	Global and overview maps;Amino acid metabolism	Organic acids and derivatives	Carboxylic acids and derivatives	174.04	0.167648	69.3	-	-3.99152	-	Amino acids, peptides, and analogues	6.2325	6.3302	6.3568	6.1689	6.1629	6.1141	5.8916	5.8417	6.0616	6.0776	5.9355	6.0386	6.2798	6.1321	6.2252
neg_17068	5'-CMP	metab_31035	map00240;map01100	Pyrimidine metabolism; Metabolic pathways	HMDB0000095	M-H	C9H14N3O8P	1.0892	C00055	neg	Nucleic acids	Nucleotides	Metabolism;Metabolism	Nucleotide metabolism;Global and overview maps	Nucleosides, nucleotides, and analogues	Pyrimidine nucleotides	322.045	0.140548	60.4	-	0.378565	-	Pyrimidine ribonucleotides	5.8379	5.8293	5.8181	5.7849	5.7752	5.752	5.4346	5.436	5.4653	5.4209	5.4454	5.4552	5.5785	5.4599	5.5023
neg_17167	Pi-Methylimidazoleacetic acid	metab_31134	-	-	HMDB0004988	M-H	C6H8N2O2	1.0136	-	neg	-	-	-	-	Organoheterocyclic compounds	Azoles	139.05	0.0357299	-	71	-6.76208	4200-48-0	Imidazoles	5.634	5.718	5.8095	5.614	5.6364	5.6148	4.4254	4.2871	4.5489	4.5593	4.5081	4.49	5.4381	5.4598	5.4685
neg_17201	O-Ureidohomoserine	metab_31168	-	-	HMDB0012271	3M-H	C5H11N3O4	0.9717	-	neg	-	-	-	-	Organic acids and derivatives	Carboxylic acids and derivatives	530.222	0.180797	-	79.4	8.67326	51767-67-0	Amino acids, peptides, and analogues	4.9734	5.1554	5.1875	5.1531	4.9822	4.9479	5.2794	5.2571	5.3644	5.4516	5.3725	5.3502	5.3808	5.2247	5.3508
neg_17250	Myricatomentoside II	metab_31216	-	-	HMDB0031584	M+K-2H	C27H34O11	0.9083	-	neg	-	-	-	-	Phenylpropanoids and polyketides	Diarylheptanoids	571.162	0.282093	-	74	6.43831	191999-63-0	Cyclic diarylheptanoids	5.5867	5.7385	5.6463	5.6186	5.6174	5.587	5.3709	5.3817	5.4564	5.2509	5.3034	5.4585	5.6999	5.4546	5.5697
neg_17606	Imidazoleacetic acid	metab_31571	map01100;map00340	Metabolic pathways; Histidine metabolism	HMDB0029736;HMDB0002024	M-H	C5H6N2O2	0.6634	C02835	neg	-	-	Metabolism;Metabolism	Global and overview maps;Amino acid metabolism	Organic acids and derivatives	Carboxylic acids and derivatives	125.035	0.101661	63.4	-	-8.37325	22884-10-2;645-65-8	Amino acids, peptides, and analogues	5.099	5.0226	5.055	5.0113	5.0411	5.0465	4.8615	4.7734	4.8765	4.7627	4.8195	4.8498	4.9957	4.9083	4.9718
neg_12623	APC	metab_32180	map00983	Drug metabolism - other enzymes	HMDB0060661	M-H	C33H38N4O8	3.9724	C16542	neg	-	-	Metabolism	Xenobiotics biodegradation and metabolism	Organic oxygen compounds	Organooxygen compounds	617.257	0.0960968	-	84.2	-6.85295	-	Carbonyl compounds	6.0305	6.0001	6.0366	5.9774	6.0106	5.9597	5.8071	5.7687	5.7315	5.7965	5.8298	5.77	5.9481	5.9371	5.8688
neg_4208	Protoporphyrin IX	metab_32192	map01100;map01110;map00860	Metabolic pathways; Biosynthesis of secondary metabolites; Porphyrin and chlorophyll metabolism	HMDB0000241;HMDB0012947	M-H2O-H	C34H34N4O4	2.5388	C02191	neg	-	-	Metabolism;Metabolism;Metabolism	Global and overview maps;Global and overview maps;Metabolism of cofactors and vitamins	Organoheterocyclic compounds	Tetrapyrroles and derivatives	543.243	0.056245	-	62.8	5.14371	553-12-8	Porphyrins	6.1501	6.1693	6.137	6.1347	6.1702	6.1568	5.9458	5.9596	5.9476	5.8653	5.9417	5.967	6.1035	6.069	6.057

## Sheet: Attraction test-larvae
Group	1	2	3	4	5	6	7	8	9	10
A	4	4	3	1	5	4	1	4	3	4
CK	1	1	2	4	0	1	4	1	2	1
Group	1	2	3	4	5	6	7	8	9	10
B	5	3	4	4	5	5	4	4	5	5
CK	0	2	1	1	0	0	1	1	0	0
group	1	2	3	4	5	6	7	8	9	10
C	4	4	3	4	3	4	3	4	3	4
CK	1	1	2	1	2	1	2	1	2	1
group	1	2	3	4	5	6
L-Prolinamide	3	4	5	2	3	2
CK	7	6	5	8	7	8
group	1	2	3	4	5	6
2-Hydroxycinnamic Acid	4	5	6	5	6	6
CK	6	5	4	5	4	4
group	1	2	3	4	5	6
3-Indoleacetic Acid	2	4	4	4	4	3
CK	8	6	6	6	6	7

## Sheet: Attraction test-adult
Days post emergence		autoclaved supernatant of E. cloacae	ddH2O			supernatant of Enterobacter cloacae	ddH2O			autoclaved supernatant of E. cloacae	supernatant of Enterobacter cloacae
0	Famale	18	12		Famale	9	21		Famale	24	6
	Male	23	7		Male	9	21		Male	19	11
	Famale	19	11		Famale	9	21		Famale	24	6
	Male	18	12		Male	9	21		Male	22	8
	Famale	21	9		Famale	11	19		Famale	23	7
6	Famale	25	5		Famale	11	19		Famale	22	8
	Male	23	7		Male	14	16		Male	21	9
	Famale	20	10		Famale	15	15		Famale	22	8
	Male	22	8		Male	10	20		Male	22	8
	Famale	20	10		Famale	12	18		Famale	22	8
	Male	20	10		Male	12	18		Male	24	6
15	Famale	22	8		Famale	13	17		Famale	25	5
	Male	26	4		Male	9	21		Male	27	3
	Famale	19	11		Famale	12	18		Famale	22	8
	Male	17	13		Male	7	23		Male	21	9
	Famale	20	10		Famale	9	21		Famale	22	8
	Male	21	9		Male	9	21		Male	21	9
Days post emergence		2-Hydroxycinnamic Acid	CK			L-Prolinamide	CK			3-Indoleacetic Acid	CK
0	Famale	15	15		Famale	19	11		Famale	15	15
	Male	12	18		Male	20	10		Male	16	14
	Famale	16	14		Famale	20	10		Famale	14	16
	Male	13	17		Male	19	11		Male	14	16
	Famale	15	15		Famale	18	12		Famale	16	14
	Male	13	17		Male	17	13		Male	15	15
6	Famale	17	13		Famale	22	8		Famale	16	14
	Male	11	19		Male	17	13		Male	14	16
	Famale	17	13		Famale	17	13		Famale	15	15
	Male	13	17		Male	20	10		Male	13	17
	Famale	16	14		Famale	18	12		Famale	16	14
	Male	11	19		Male	17	13		Male	14	16
15	Famale	16	14		Famale	18	12		Famale	14	16
	Male	14	16		Male	18	12		Male	16	14
	Famale	15	15		Famale	17	13		Famale	12	18
	Male	14	16		Male	18	12		Male	16	14
	Famale	16	14		Famale	20	10		Famale	13	17
	Male	13	17		Male	17	13		Male	17	13

## Sheet: Synergistic effect of L-Prolina
Group	1	2	3	4
L-Prolinamide	101	76	60	70
CK	45	10	45	38
